# Supplementary material for: Validation of lipid-related therapeutic targets for coronary heart disease prevention using human genetics
Source: PubMed Central journal article supplement (PMC8531035; doi:10.1038/s41467-021-25731-z), 2021-10-21
Supplement: 41467_2021_25731_MOESM1_ESM.pdf [file 41467_2021_25731_MOESM1_ESM.pdf]

## Supplementary Information

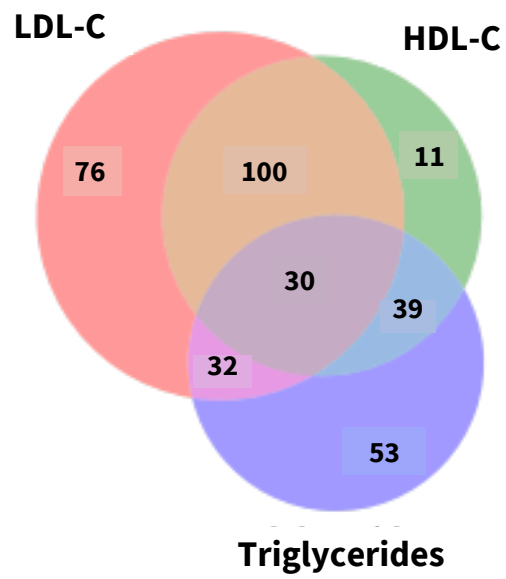

**Supplementary Figure 1. Overlap between genes encoding druggable targets associated with the major lipid subfractions.** The Venn diagram shows genes exhibiting overlapping or exclusive associations with LDL-C, HDL-C and/or TG.

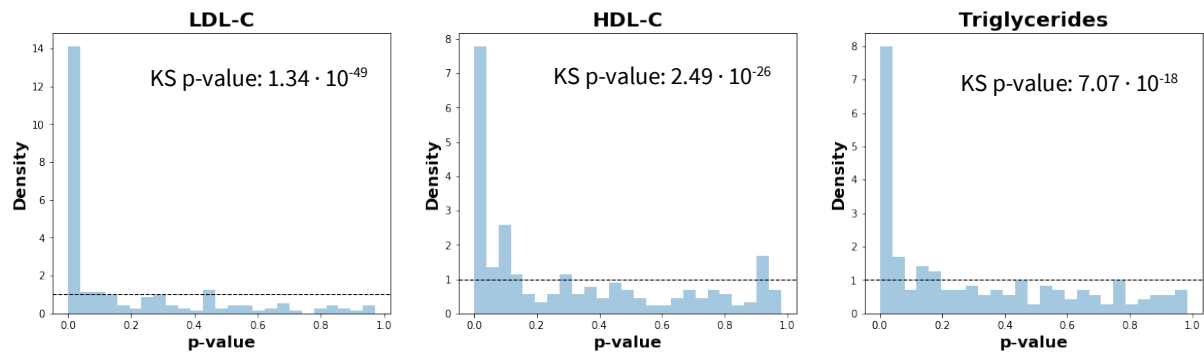

**Supplementary Figure 2. Density distribution of the p-values in the discovery analysis by exposure.** Kolmogorov-Smirnov (KS) goodness-of-fit test (two-sided) against the continuous uniform distribution of  $P$  values (black dashed line) expected under the null-hypothesis of no association between any of the targets and coronary heart disease, when the effect is instrument via LDL-C, HDL-C and TG effects.

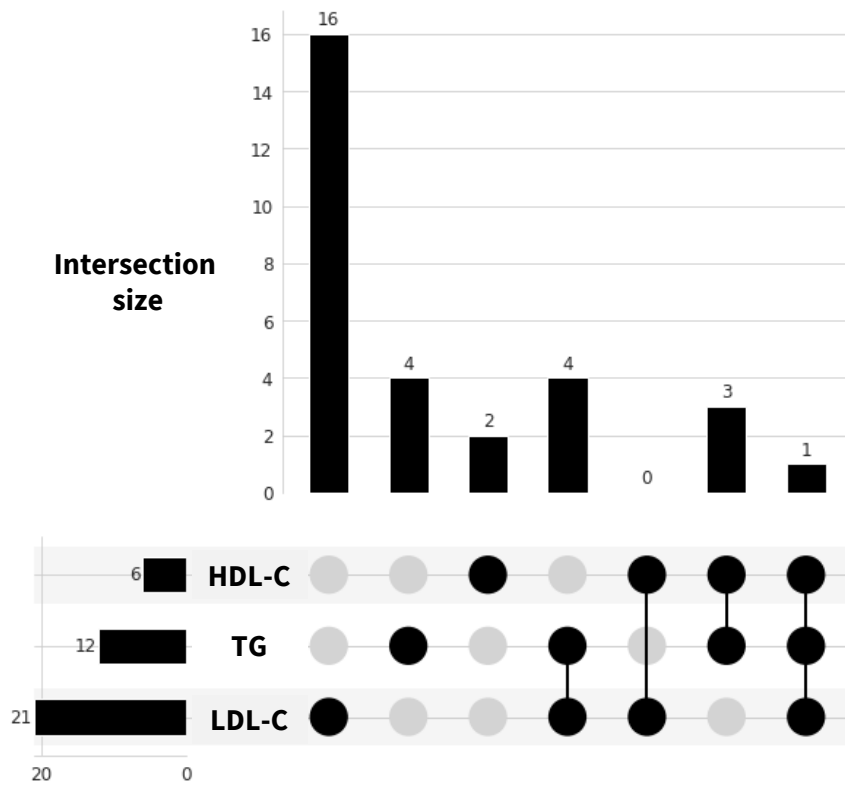

**Supplementary Figure 3. The sets of assigned genes associated with LDL-C, HDL-C, TG that encode druggable targets.** Genes encoding druggable targets were included if they demonstrated concordant direction of effect in the discovery and validation studies on CHD showing a causal effect of one or more lipid sub-fractions.

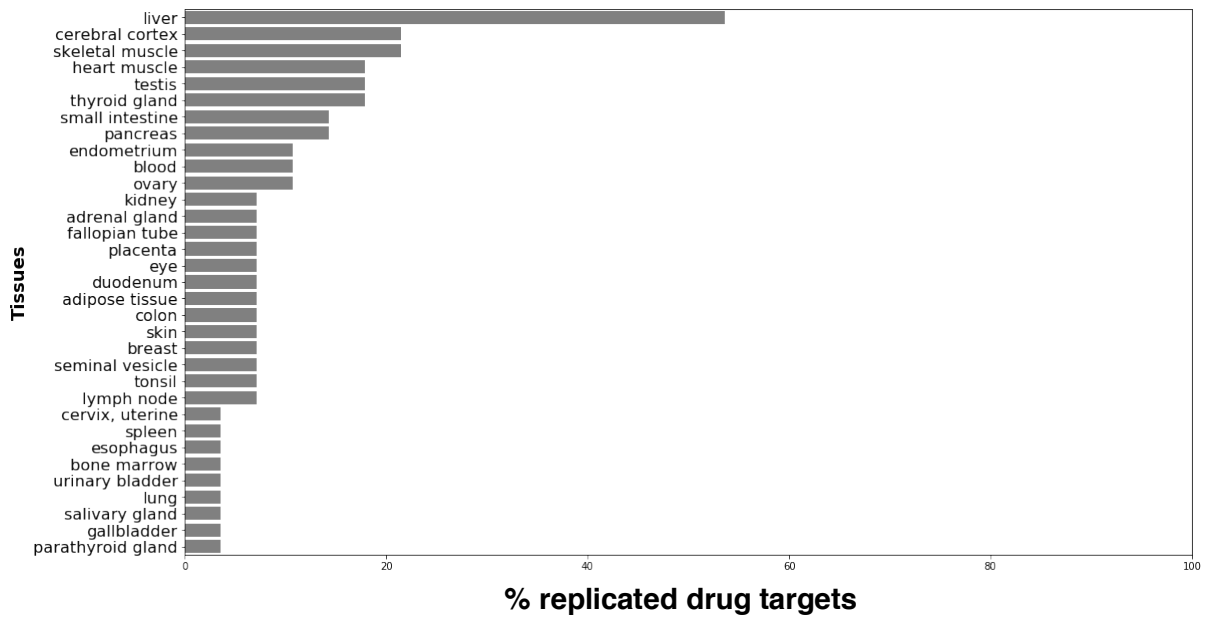

**Supplementary Figure 4. Tissue expression profile of the replicated drug target genes.** The tissue specificity metric, z-score, which quantifies how elevated the gene expression is in a particular tissue compared to others, was calculated for the set of 30 replicated genes encoding a druggable target. Of the 28 genes with RNAseq data available, 15 genes in the validated set (54%) were highly expressed in liver (z-score > 1), 13 (46%) did not have elevated liver expression.

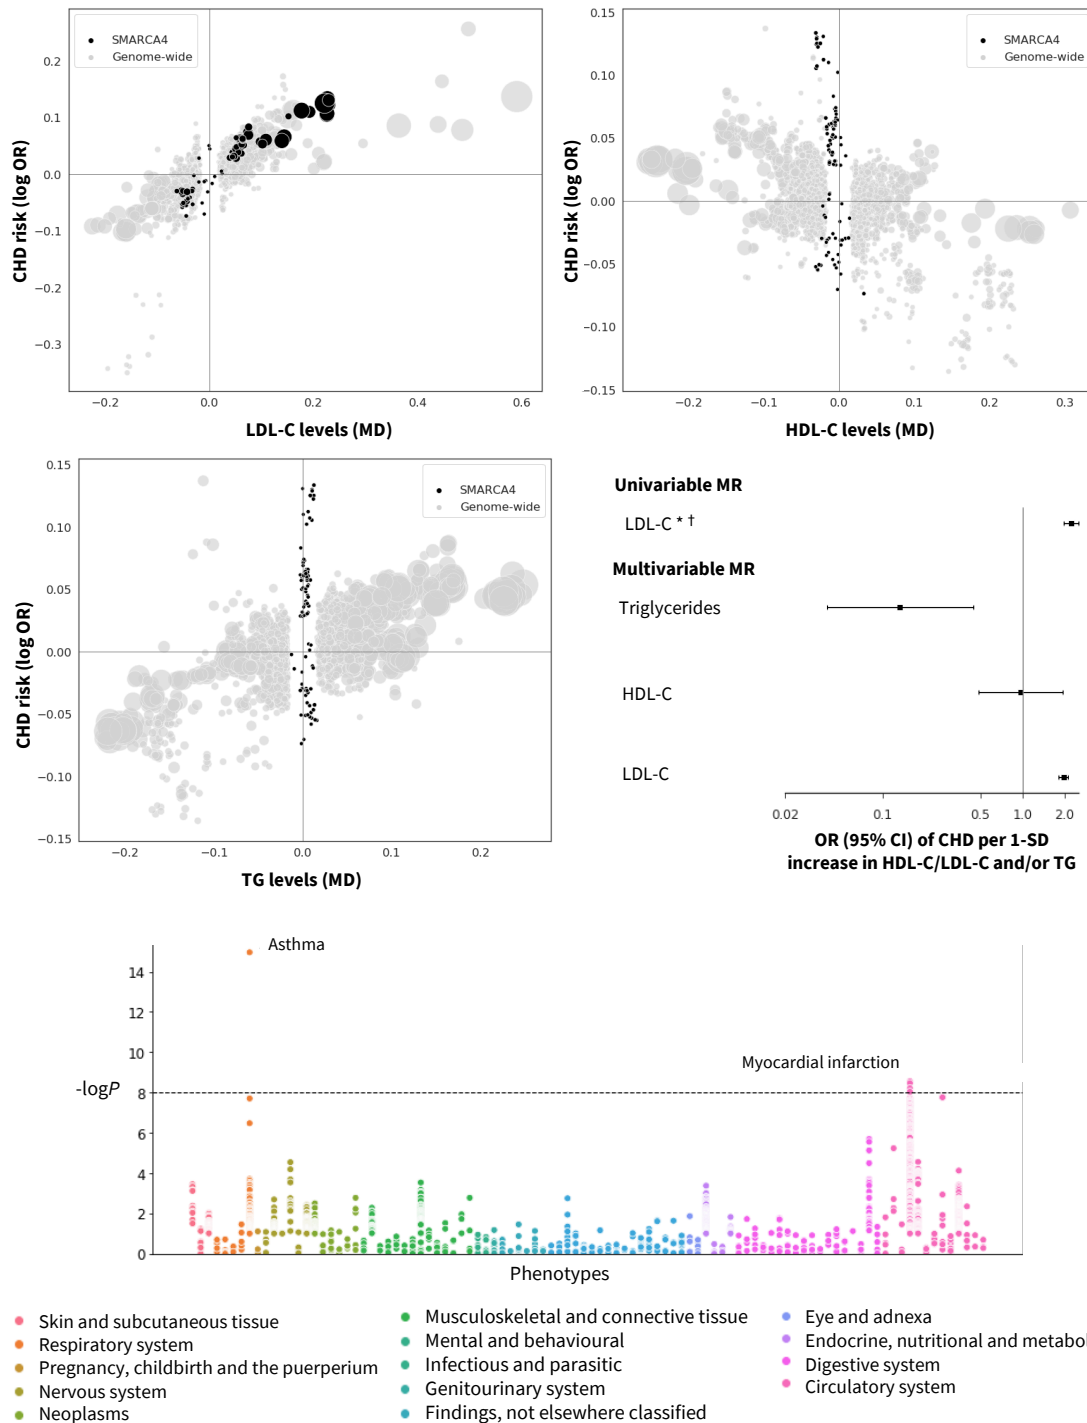

**Supplementary Figure 5. Prioritized target: SMARCA4.** The top and middle left panels show genetic associations at the locus ( $\pm 50\text{kbp}$ ) in black vs genome-wide associations (grey,  $P$  value  $< 1 \times 10^{-6}$  based on two-sided z-tests). The x-axis shows the per allele effect on the corresponding lipid expressed as mean difference (MD) from GLGC and the y-axis indicates the per allele effect on CHD expressed as log odds ratios (OR) from CardiogramPlusC4D. The marker size indicates the significance of the association with the lipid sub-fraction ( $P$ -value). The middle right panel shows the result of the univariable and multivariable (drug target) *cis*-MR results presented as OR and 95% confidence intervals with lipid exposure ( $n=188,577$  individuals) and CHD outcome ( $n= 60,801$  cases and 123,504 controls). ‘\*’ indicates the MR estimates as being replicated, and ‘†’ that the lipid effect and CHD signals are co-localized. The bottom panel shows disease associations at the locus with 102 clinical end points from UK Biobank and GWAS Consortia.

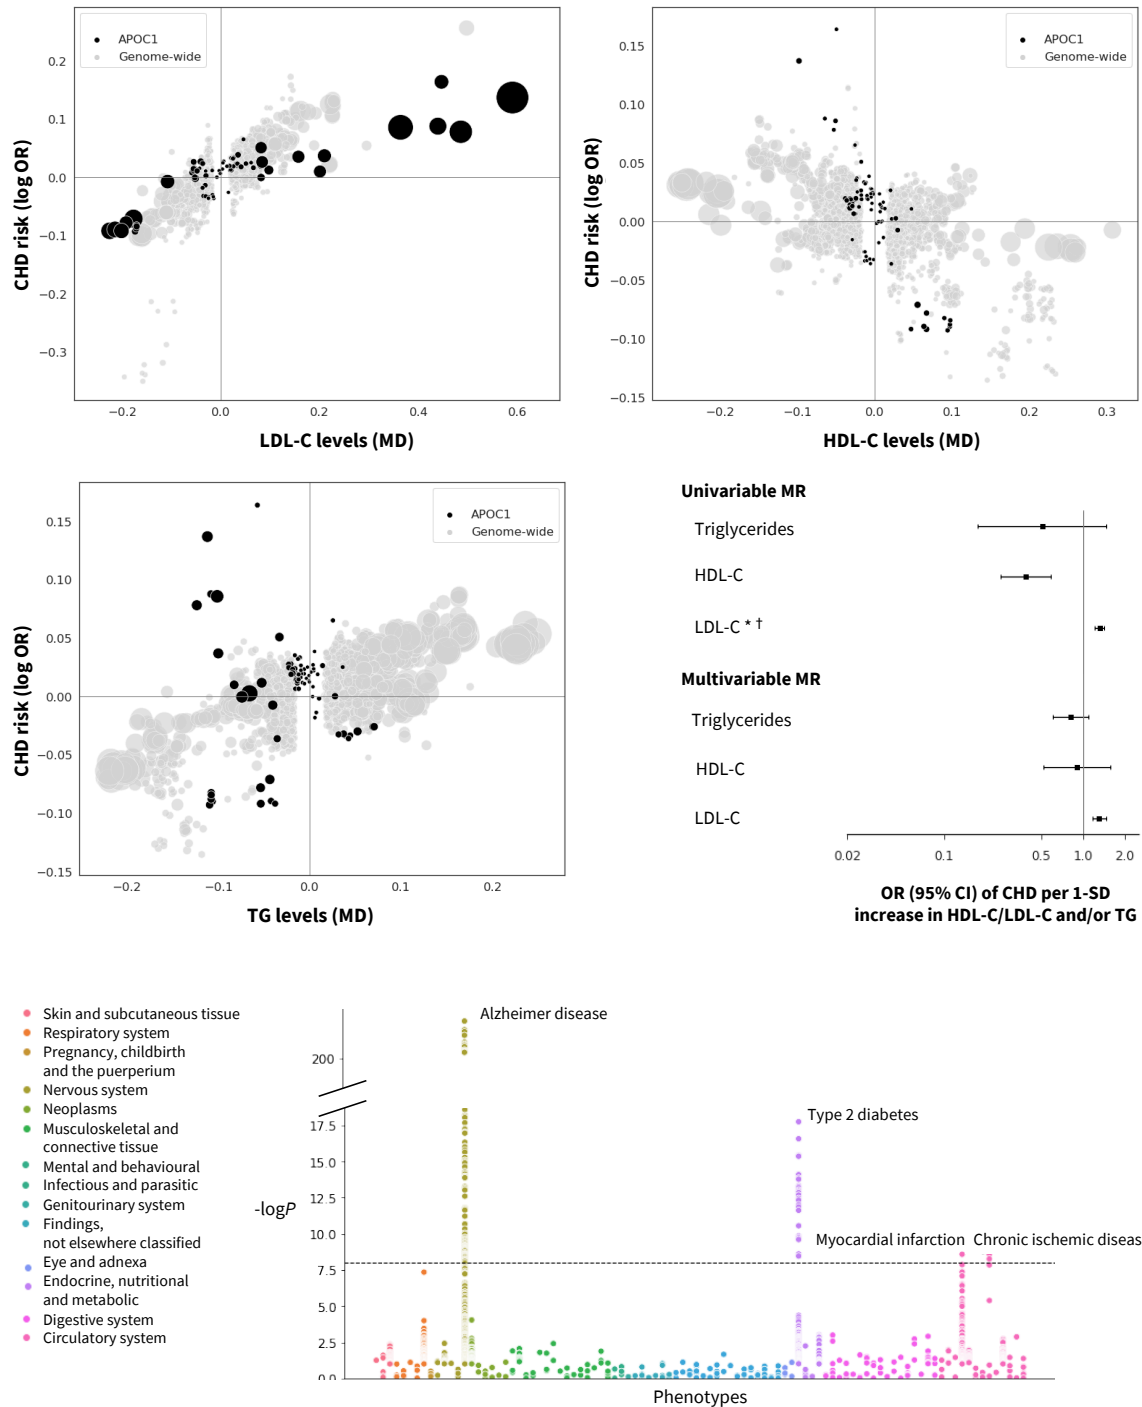

**Supplementary Figure 6. Prioritized target: APOC1.** The top and middle left panels show genetic associations at the locus ( $\pm 50\text{kbp}$ ) in black vs genome-wide associations (grey,  $P$  value  $< 1 \times 10^{-6}$  based on two-sided z-tests). The x-axis shows the per allele effect on the corresponding lipid expressed as mean difference (MD) from GLGC and the y-axis indicates the per allele effect on CHD expressed as log odds ratios (OR) from CardiogramPlusC4D. The marker size indicates the significance of the association with the lipid sub-fraction ( $P$ -value). The middle right panel shows the result of the univariable and multivariable (drug target) *cis*-MR results presented as OR and 95% confidence intervals with lipid exposure ( $n=188,577$  individuals) and CHD outcome ( $n= 60,801$  cases and 123,504 controls). ‘\*’ indicates the MR estimates as being replicated, and ‘†’ that the lipid effect and CHD signals are co-localized. The bottom panel shows disease associations at the locus with 102 clinical end points from UK Biobank and GWAS Consortia.

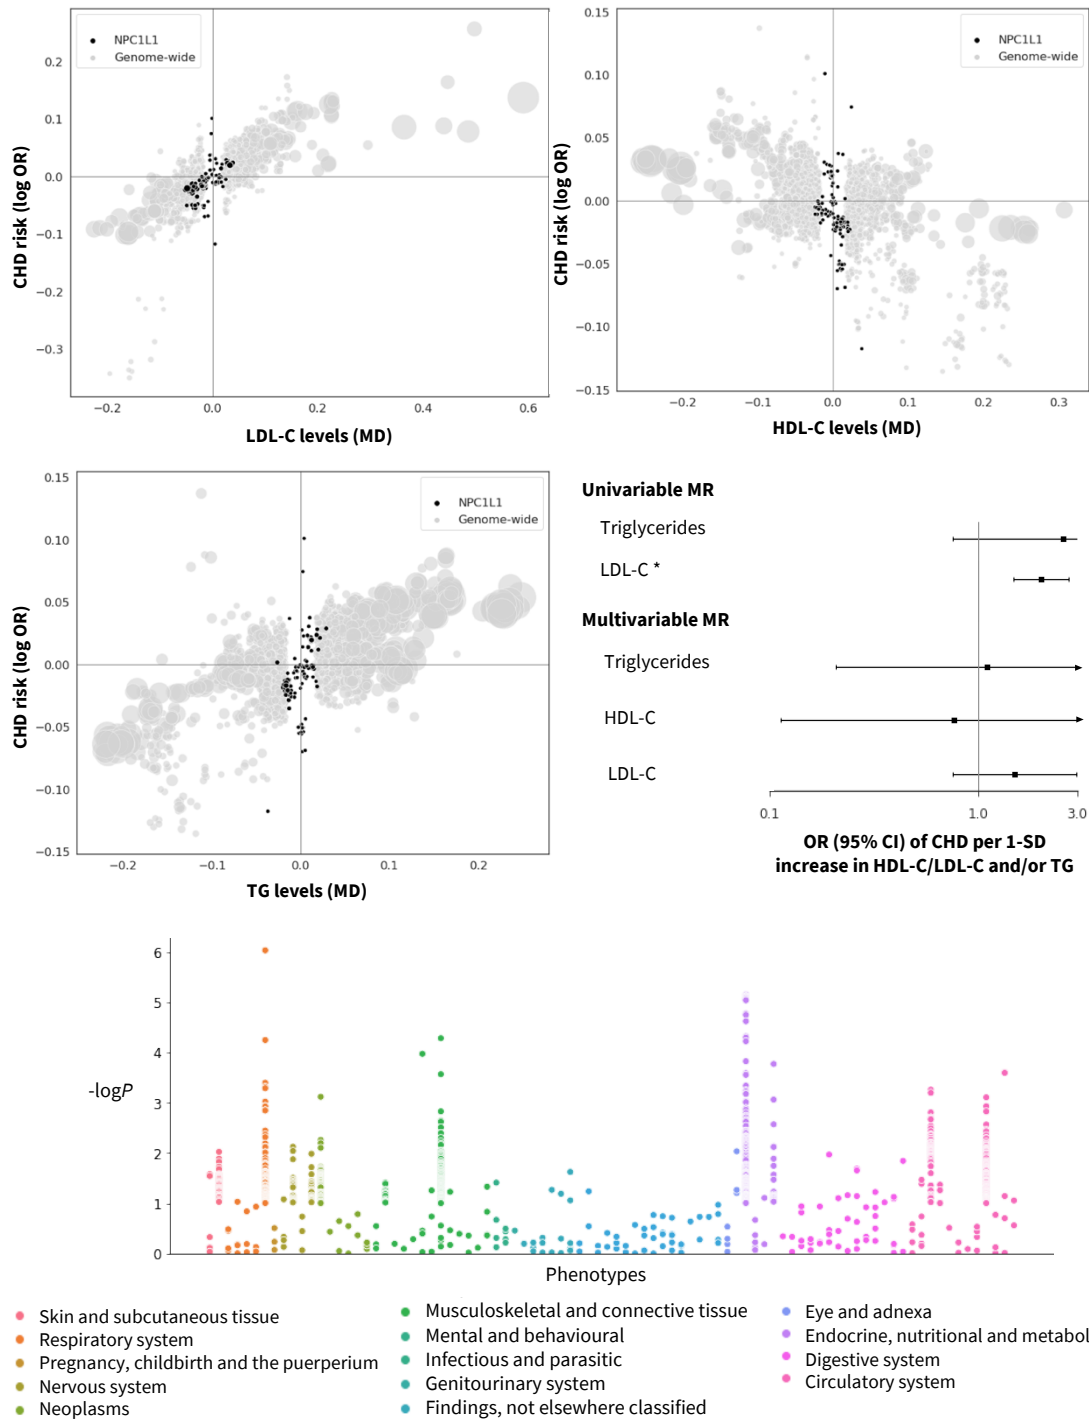

**Supplementary Figure 7. Prioritized target: NPC1L1.** The top and middle left panels show genetic associations at the locus ( $\pm 50\text{kbp}$ ) in black vs genome-wide associations (grey,  $P$  value  $< 1 \times 10^{-6}$  based on two-sided z-tests). The x-axis shows the per allele effect on the corresponding lipid expressed as mean difference (MD) from GLGC and the y-axis indicates the per allele effect on CHD expressed as log odds ratios (OR) from CardiogramPlusC4D. The marker size indicates the significance of the association with the lipid sub-fraction ( $P$ -value). The middle right panel shows the result of the univariable and multivariable (drug target) *cis*-MR results presented as OR and 95% confidence intervals with lipid exposure ( $n=188,577$  individuals) and CHD outcome ( $n= 60,801$  cases and 123,504 controls). ‘\*’ indicates the MR estimates as being replicated, and ‘†’ that the lipid effect and CHD signals are co-localized. The bottom panel shows disease associations at the locus with 102 clinical end points from UK Biobank and GWAS Consortia.



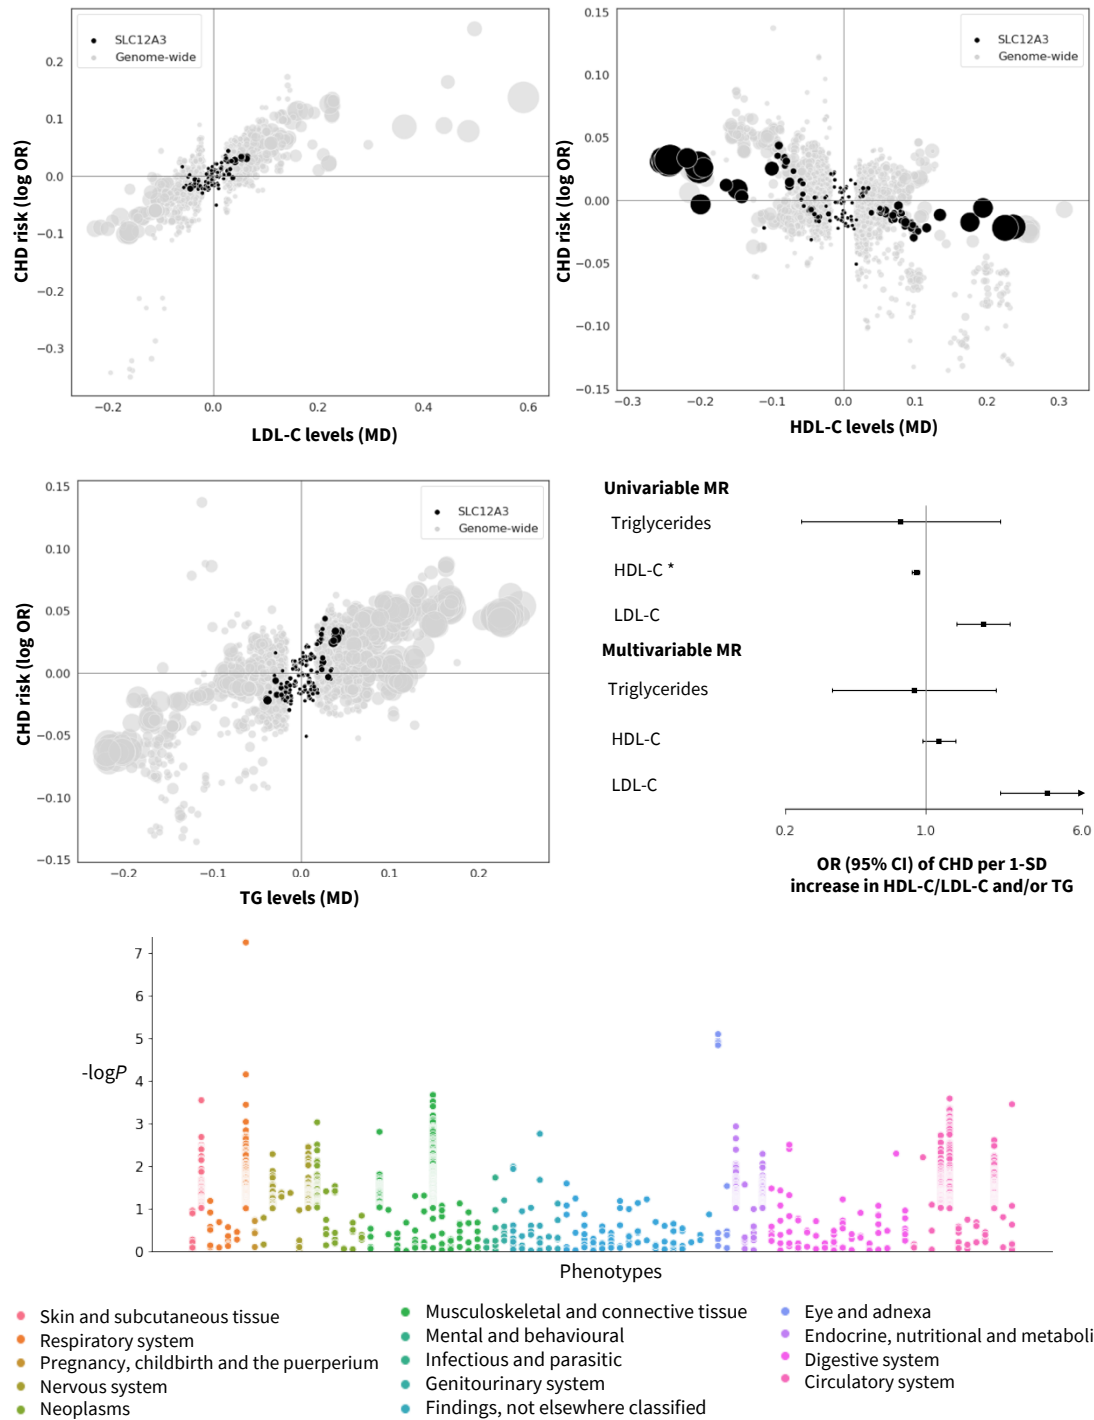

**Supplementary Figure 8. Prioritized target: SLC12A3.** The top and middle left panels show genetic associations at the locus ( $\pm 50$ kb) in black vs genome-wide associations (grey,  $P$  value  $< 1 \times 10^{-6}$  based on two-sided z-tests). The x-axis shows the per allele effect on the corresponding lipid expressed as mean difference (MD) from GLGC and the y-axis indicates the per allele effect on CHD expressed as log odds ratios (OR) from CardiogramPlusC4D. The marker size indicates the significance of the association with the lipid sub-fraction ( $P$ -value). The middle right panel shows the result of the univariable and multivariable (drug target) *cis*-MR results presented as OR and 95% confidence intervals with lipid exposure ( $n=188,577$  individuals) and CHD outcome ( $n= 60,801$  cases and 123,504 controls). ‘\*’ indicates the MR estimates as being replicated, and ‘†’ that the lipid effect and CHD signals are co-localized. The bottom panel shows disease associations at the locus with 102 clinical end points from UK Biobank and GWAS Consortia.

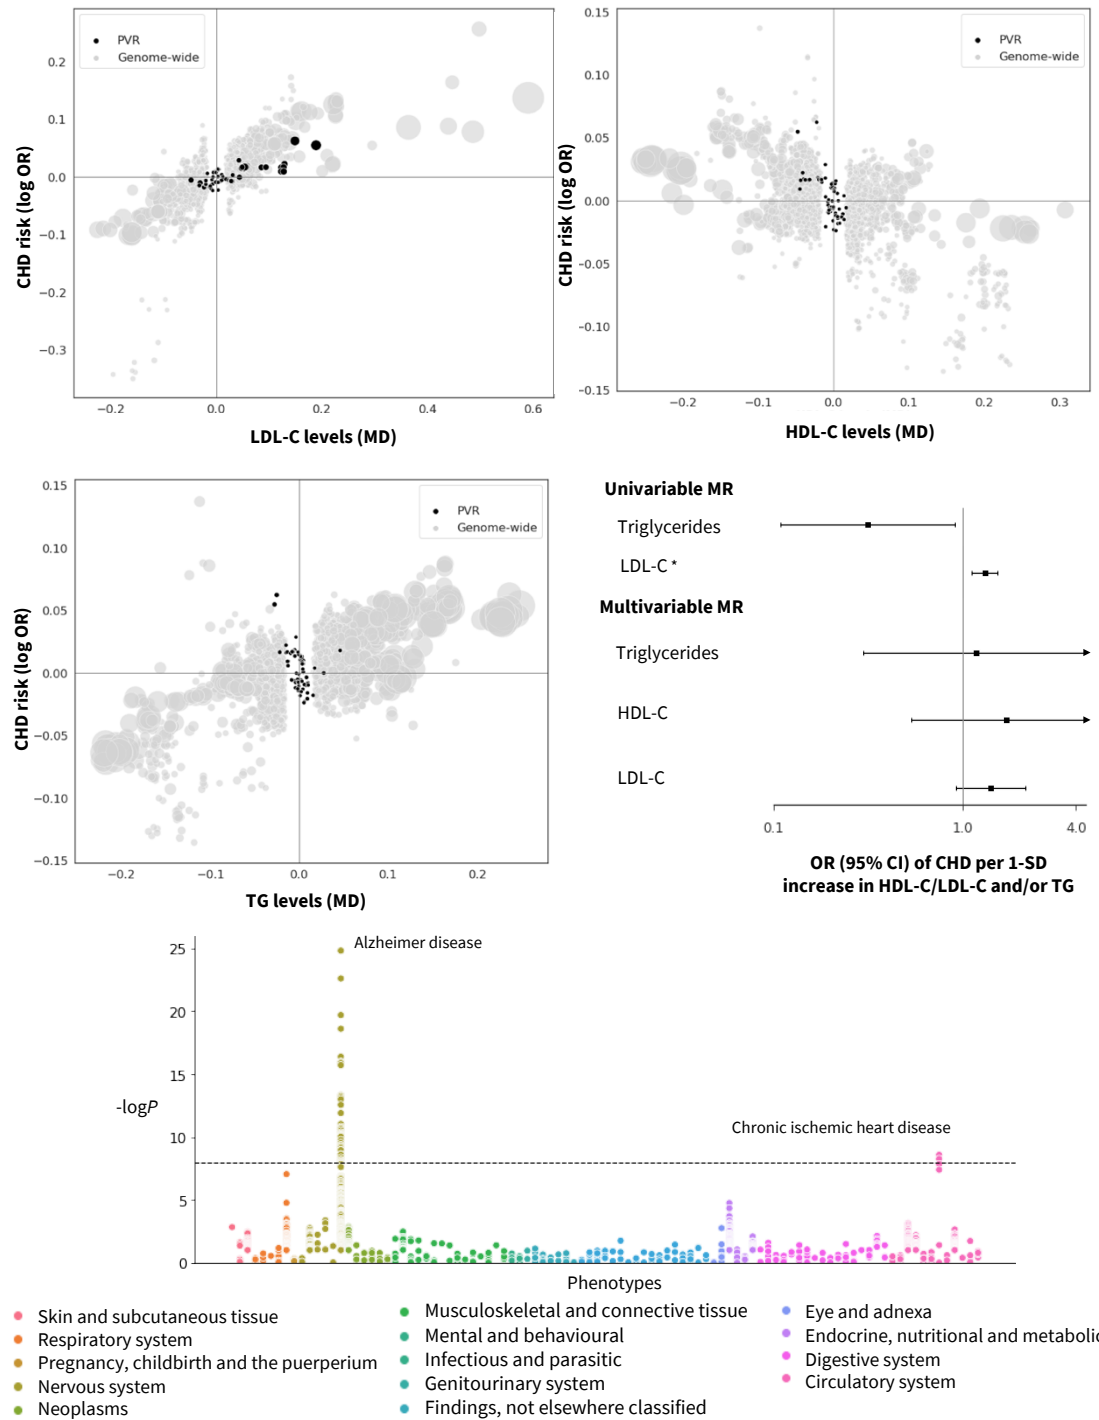

**Supplementary Figure 9. Prioritized target: PVR.** The top and middle left panels show genetic associations at the locus ( $\pm 50\text{kbp}$ ) in black vs genome-wide associations (grey,  $P$  value  $< 1 \times 10^{-6}$  based on two-sided z-tests). The x-axis shows the per allele effect on the corresponding lipid expressed as mean difference (MD) from GLGC and the y-axis indicates the per allele effect on CHD expressed as log odds ratios (OR) from CardiogramPlusC4D. The marker size indicates the significance of the association with the lipid sub-fraction ( $P$ -value). The middle right panel shows the result of the univariable and multivariable (drug target) *cis*-MR results presented as OR and 95% confidence intervals with lipid exposure ( $n=188,577$  individuals) and CHD outcome ( $n= 60,801$  cases and 123,504 controls). ‘\*’ indicates the MR estimates as being replicated, and ‘†’ that the lipid effect and CHD signals are co-localized. The bottom panel shows disease associations at the locus with 102 clinical end points from UK Biobank and GWAS Consortia.

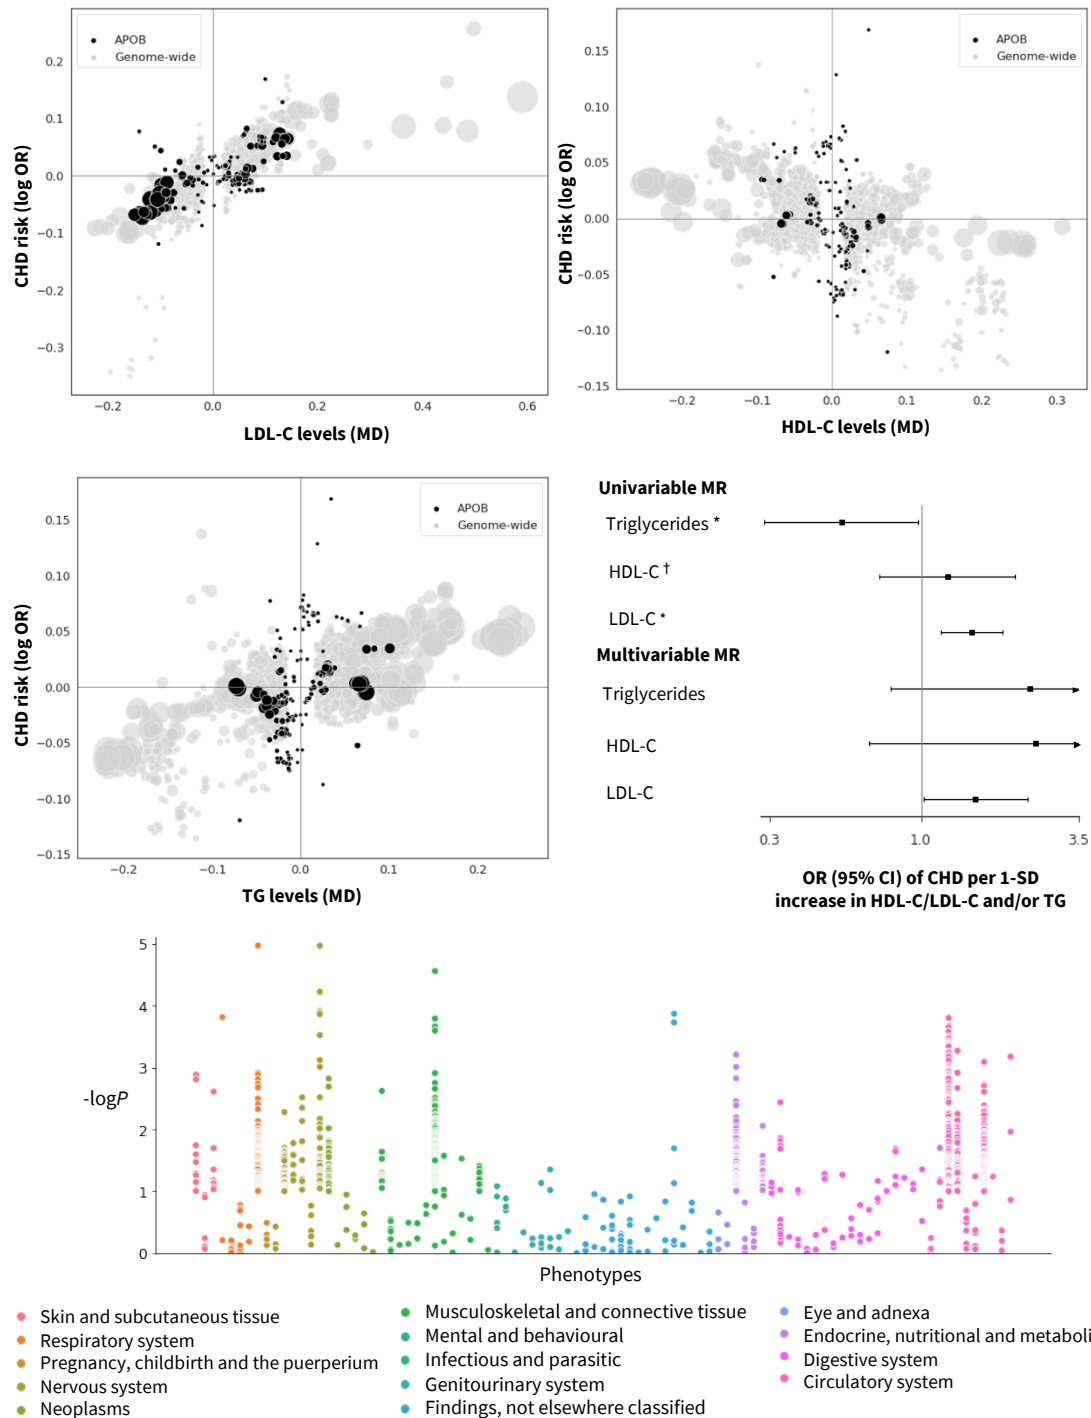

**Supplementary Figure 10. Prioritized target: APOB.** The top and middle left panels show genetic associations at the locus ( $\pm 50\text{kbp}$ ) in black vs genome-wide associations (grey,  $P$  value  $< 1 \times 10^{-6}$  based on two-sided z-tests). The x-axis shows the per allele effect on the corresponding lipid expressed as mean difference (MD) from GLGC and the y-axis indicates the per allele effect on CHD expressed as log odds ratios (OR) from CardiogramPlusC4D. The marker size indicates the significance of the association with the lipid sub-fraction ( $P$ -value). The middle right panel shows the result of the univariable and multivariable (drug target) *cis*-MR results presented as OR and 95% confidence intervals with lipid exposure ( $n=188,577$  individuals) and CHD outcome ( $n= 60,801$  cases and 123,504 controls). ‘\*’ indicates the MR estimates as being replicated, and ‘†’ that the lipid effect and CHD signals are co-localized. The bottom panel shows disease associations at the locus with 102 clinical end points from UK Biobank and GWAS Consortia.

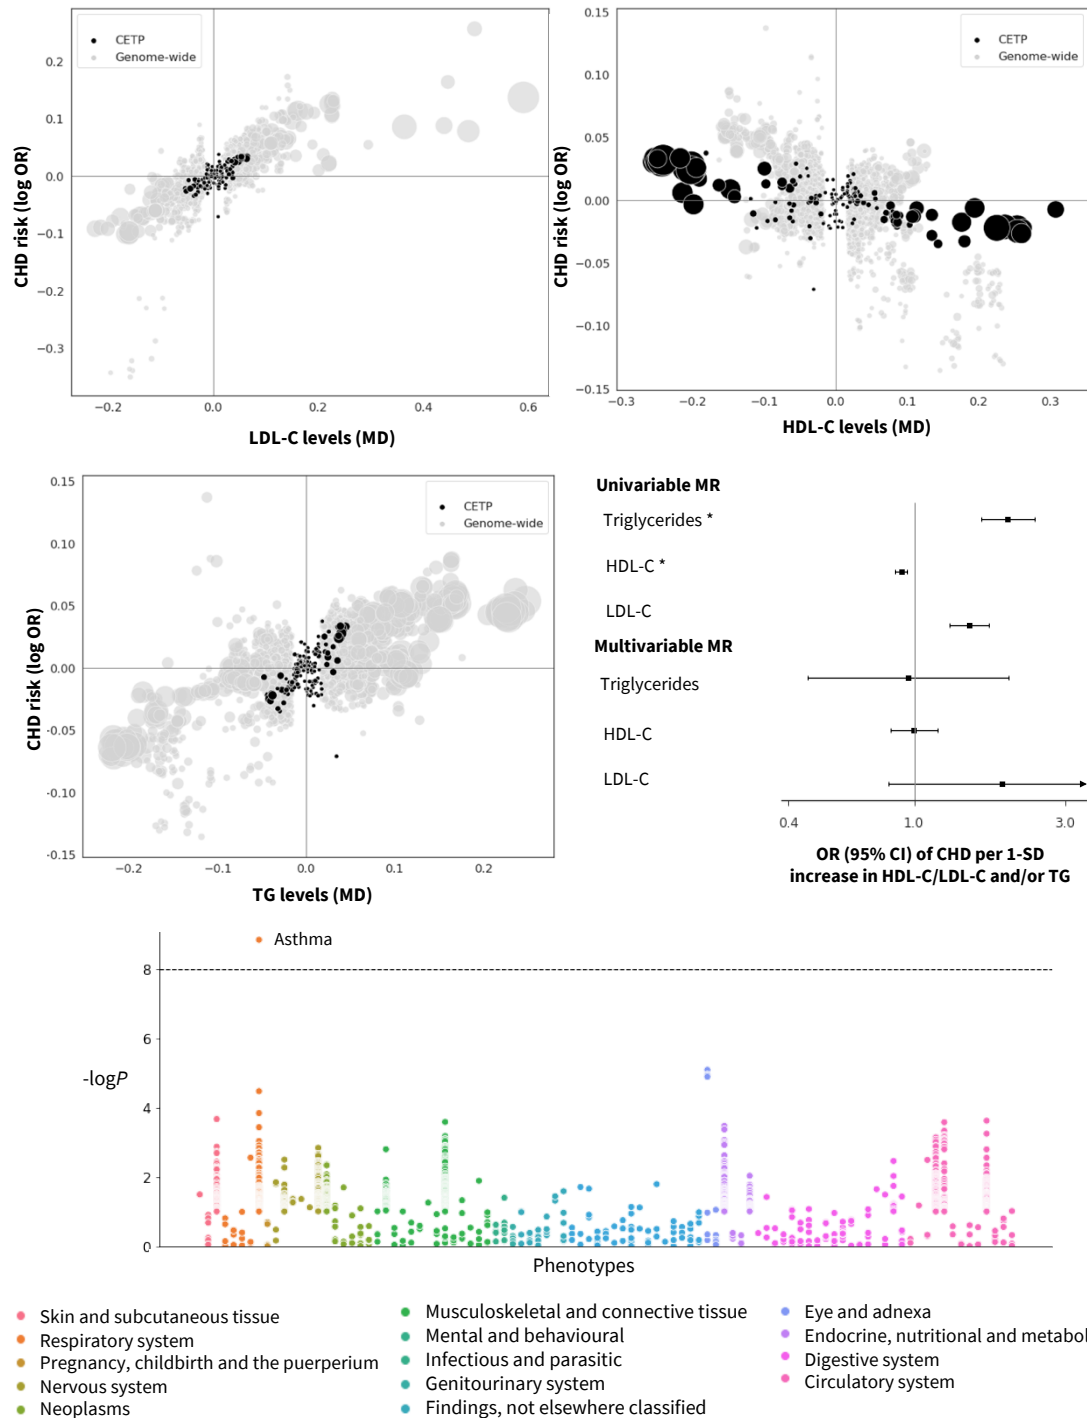

**Supplementary Figure 11. Prioritized target: CETP.** The top and middle left panels show genetic associations at the locus ( $\pm 50\text{kbp}$ ) in black vs genome-wide associations (grey,  $P$  value  $< 1 \times 10^{-6}$  based on two-sided z-tests). The x-axis shows the per allele effect on the corresponding lipid expressed as mean difference (MD) from GLGC and the y-axis indicates the per allele effect on CHD expressed as log odds ratios (OR) from CardiogramPlusC4D. The marker size indicates the significance of the association with the lipid sub-fraction ( $P$ -value). The middle right panel shows the result of the univariable and multivariable (drug target) *cis*-MR results presented as OR and 95% confidence intervals with lipid exposure ( $n=188,577$  individuals) and CHD outcome ( $n= 60,801$  cases and 123,504 controls). ‘\*’ indicates the MR estimates as being replicated, and ‘†’ that the lipid effect and CHD signals are co-localized. The bottom panel shows disease associations at the locus with 102 clinical end points from UK Biobank and GWAS Consortia.

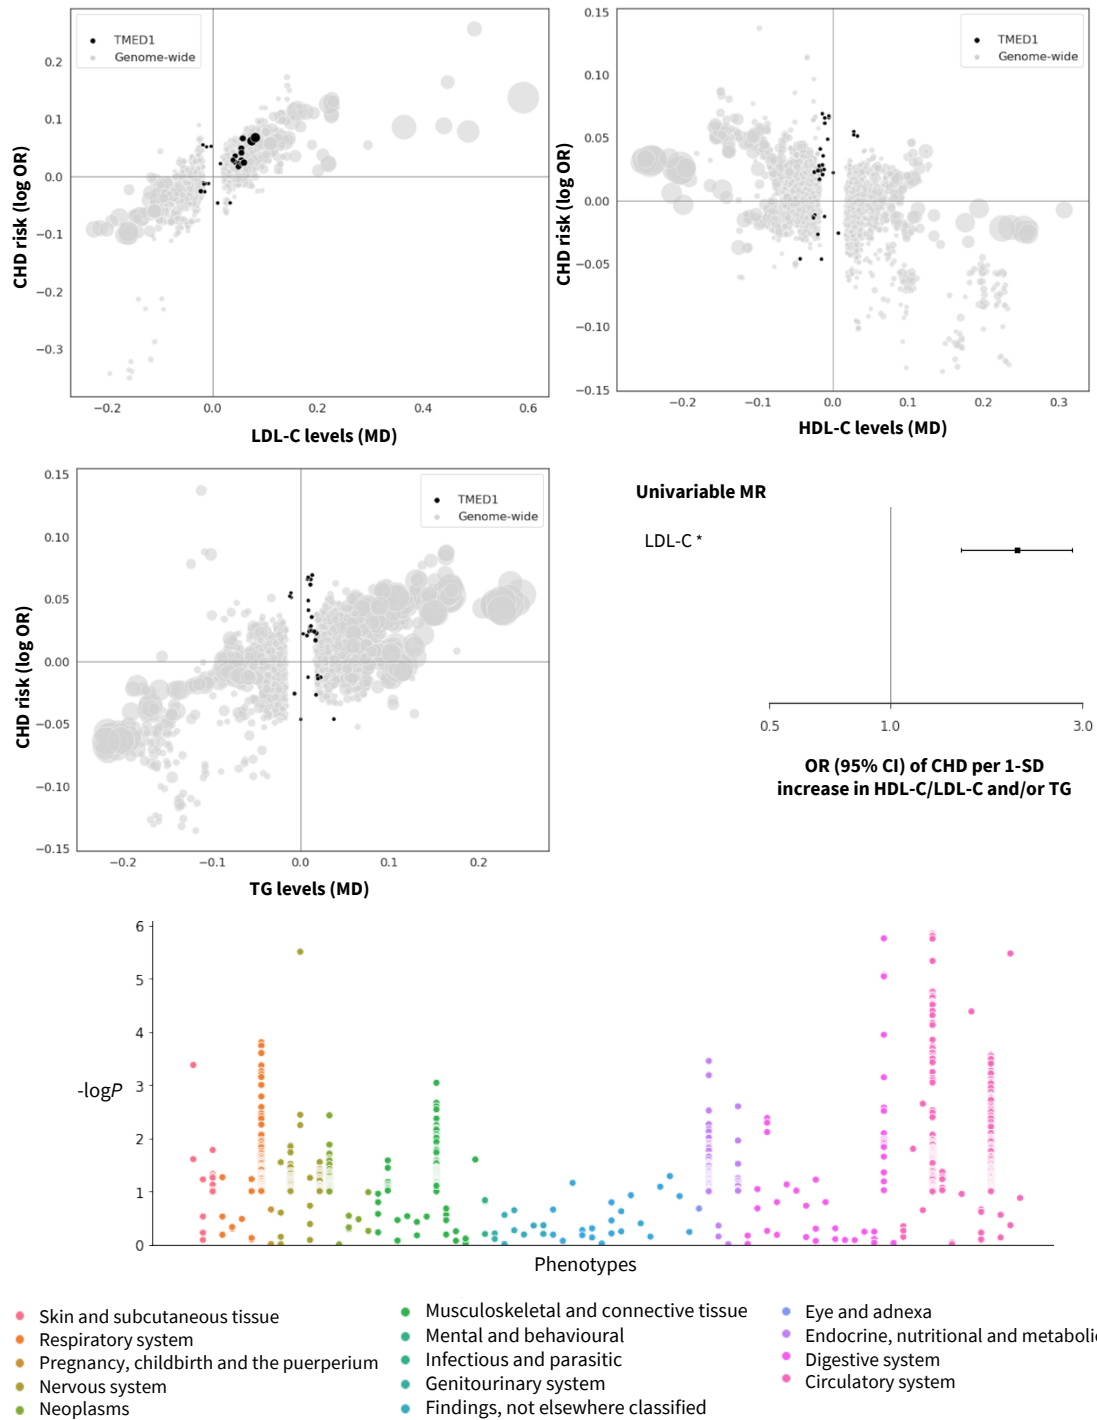

**Supplementary Figure 12. Prioritized target: TMED1.** The top and middle left panels show genetic associations at the locus ( $\pm 50\text{kbp}$ ) in black vs genome-wide associations (grey,  $P$  value  $< 1 \times 10^{-6}$  based on two-sided z-tests). The x-axis shows the per allele effect on the corresponding lipid expressed as mean difference (MD) from GLGC and the y-axis indicates the per allele effect on CHD expressed as log odds ratios (OR) from CardiogramPlusC4D. The marker size indicates the significance of the association with the lipid sub-fraction ( $P$ -value). The middle right panel shows the result of the univariable and multivariable (drug target) *cis*-MR results presented as OR and 95% confidence intervals with lipid exposure ( $n=188,577$  individuals) and CHD outcome ( $n= 60,801$  cases and 123,504 controls). ‘\*’ indicates the MR estimates as being replicated, and ‘†’ that the lipid effect and CHD signals are co-localized. The bottom panel shows disease associations at the locus with 102 clinical end points from UK Biobank and GWAS Consortia.

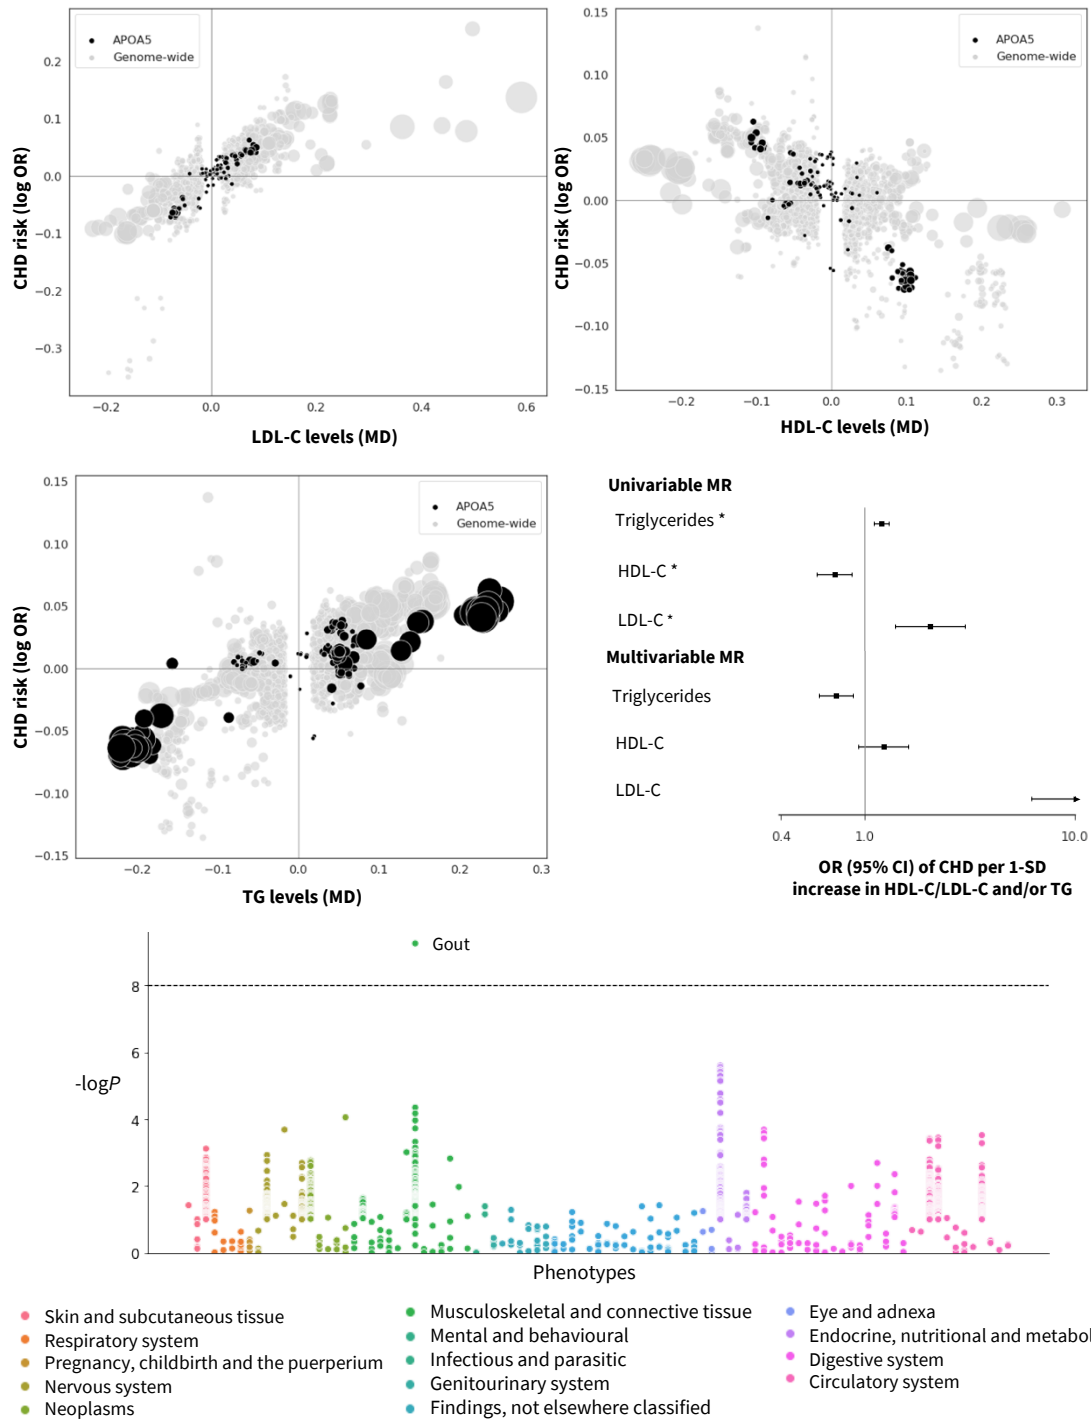

**Supplementary Figure 13. Prioritized target: APOA5.** The top and middle left panels show genetic associations at the locus ( $\pm 50$ kbp) in black vs genome-wide associations (grey,  $P$  value  $< 1 \times 10^{-6}$  based on two-sided z-tests). The x-axis shows the per allele effect on the corresponding lipid expressed as mean difference (MD) from GLGC and the y-axis indicates the per allele effect on CHD expressed as log odds ratios (OR) from CardiogramPlusC4D. The marker size indicates the significance of the association with the lipid sub-fraction ( $P$ -value). The middle right panel shows the result of the univariable and multivariable (drug target) *cis*-MR results presented as OR and 95% confidence intervals with lipid exposure ( $n=188,577$  individuals) and CHD outcome ( $n= 60,801$  cases and 123,504 controls). ‘\*’ indicates the MR estimates as being replicated, and ‘†’ that the lipid effect and CHD signals are co-localized. The bottom panel shows disease associations at the locus with 102 clinical end points from UK Biobank and GWAS Consortia.

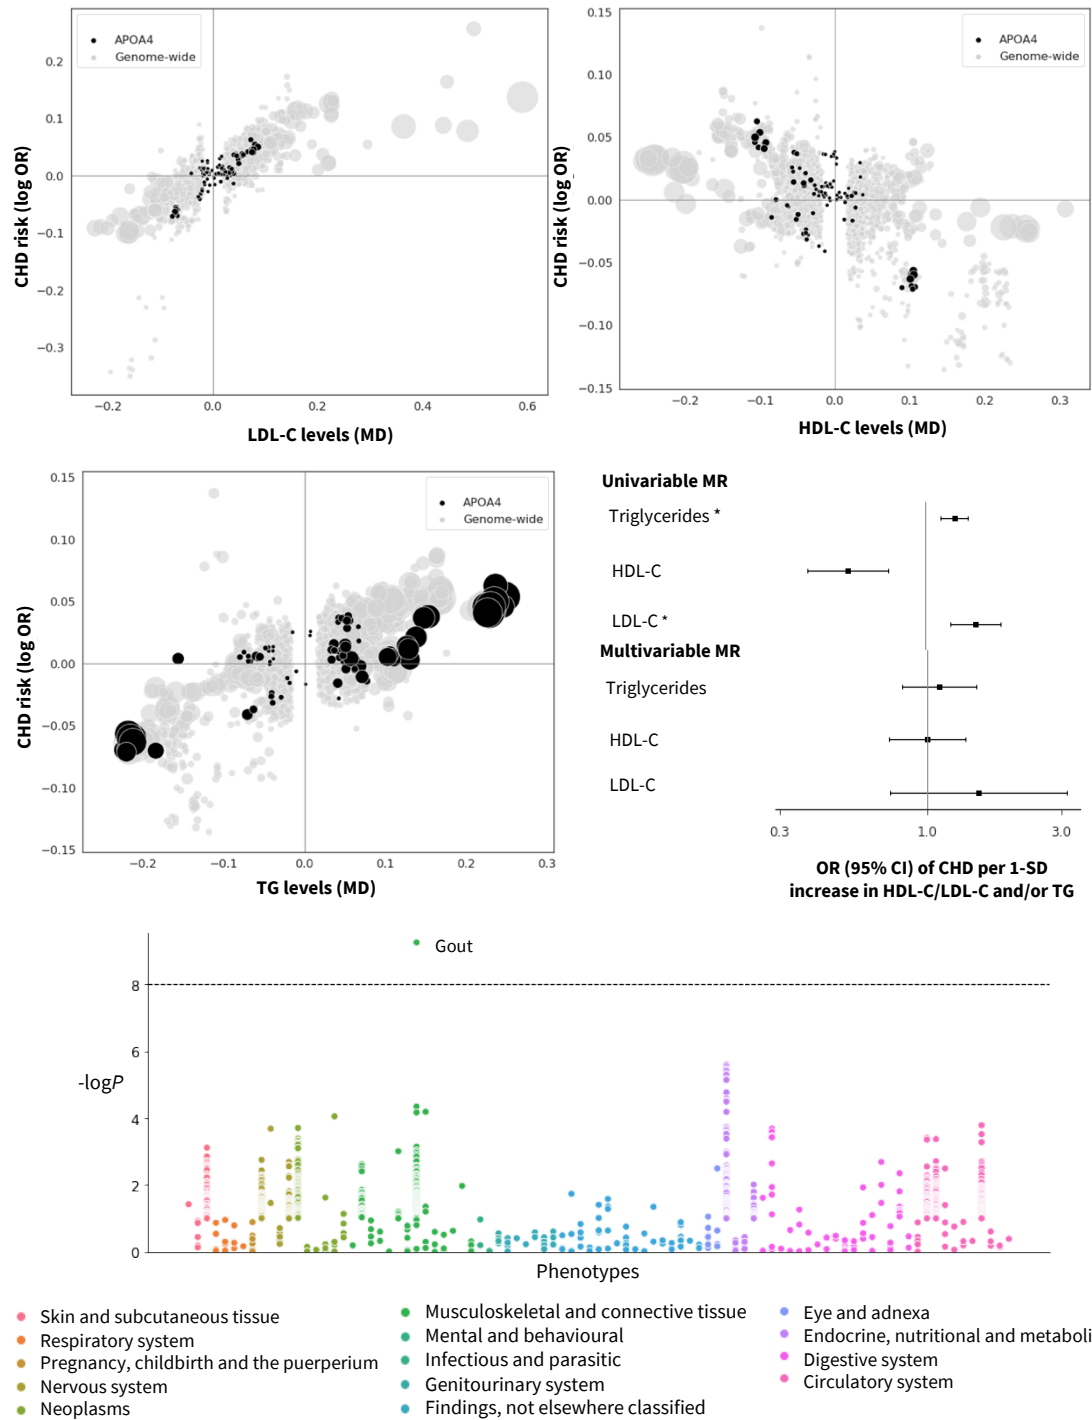

**Supplementary Figure 14. Prioritized target: APOA4.** The top and middle left panels show genetic associations at the locus ( $\pm 50\text{kbp}$ ) in black vs genome-wide associations (grey,  $P$  value  $< 1 \times 10^{-6}$  based on two-sided z-tests). The x-axis shows the per allele effect on the corresponding lipid expressed as mean difference (MD) from GLGC and the y-axis indicates the per allele effect on CHD expressed as log odds ratios (OR) from CardiogramPlusC4D. The marker size indicates the significance of the association with the lipid sub-fraction ( $P$ -value). The middle right panel shows the result of the univariable and multivariable (drug target) *cis*-MR results presented as OR and 95% confidence intervals with lipid exposure ( $n=188,577$  individuals) and CHD outcome ( $n= 60,801$  cases and 123,504 controls). ‘\*’ indicates the MR estimates as being replicated, and ‘†’ that the lipid effect and CHD signals are co-localized. The bottom panel shows disease associations at the locus with 102 clinical end points from UK Biobank and GWAS Consortia.

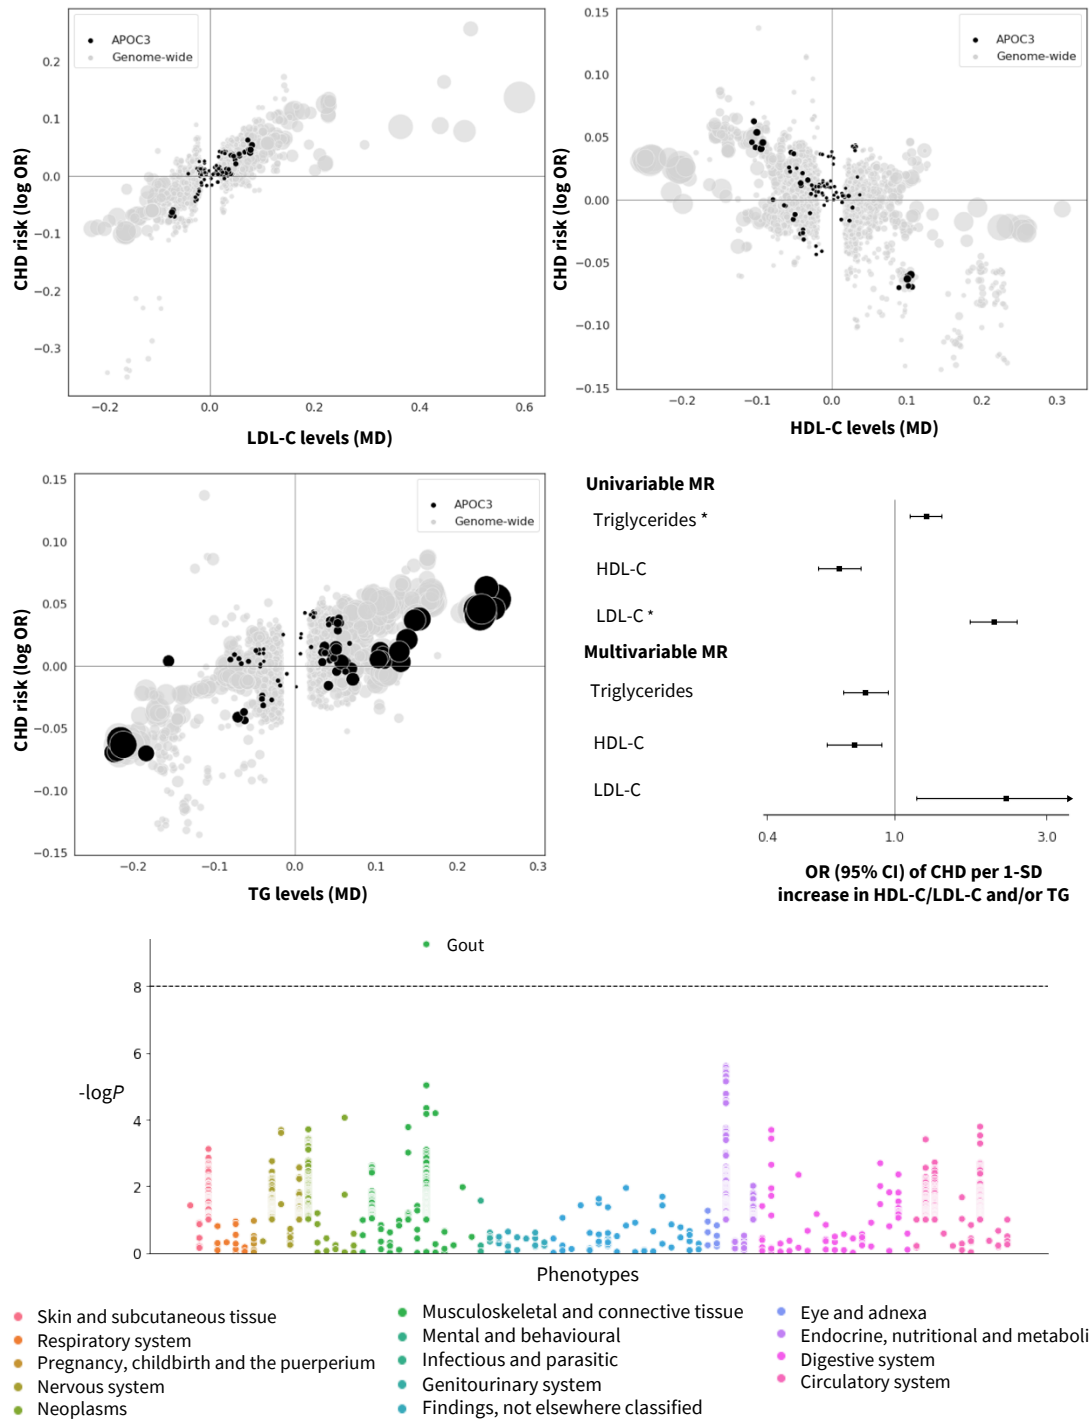

**Supplementary Figure 15. Prioritized target: APOC3.** The top and middle left panels show genetic associations at the locus ( $\pm 50\text{kbp}$ ) in black vs genome-wide associations (grey,  $P$  value  $< 1 \times 10^{-6}$  based on two-sided z-tests). The x-axis shows the per allele effect on the corresponding lipid expressed as mean difference (MD) from GLGC and the y-axis indicates the per allele effect on CHD expressed as log odds ratios (OR) from CardiogramPlusC4D. The marker size indicates the significance of the association with the lipid sub-fraction ( $P$ -value). The middle right panel shows the result of the univariable and multivariable (drug target) *cis*-MR results presented as OR and 95% confidence intervals with lipid exposure ( $n=188,577$  individuals) and CHD outcome ( $n= 60,801$  cases and 123,504 controls). ‘\*’ indicates the MR estimates as being replicated, and ‘†’ that the lipid effect and CHD signals are co-localized. The bottom panel shows disease associations at the locus with 102 clinical end points from UK Biobank and GWAS Consortia.



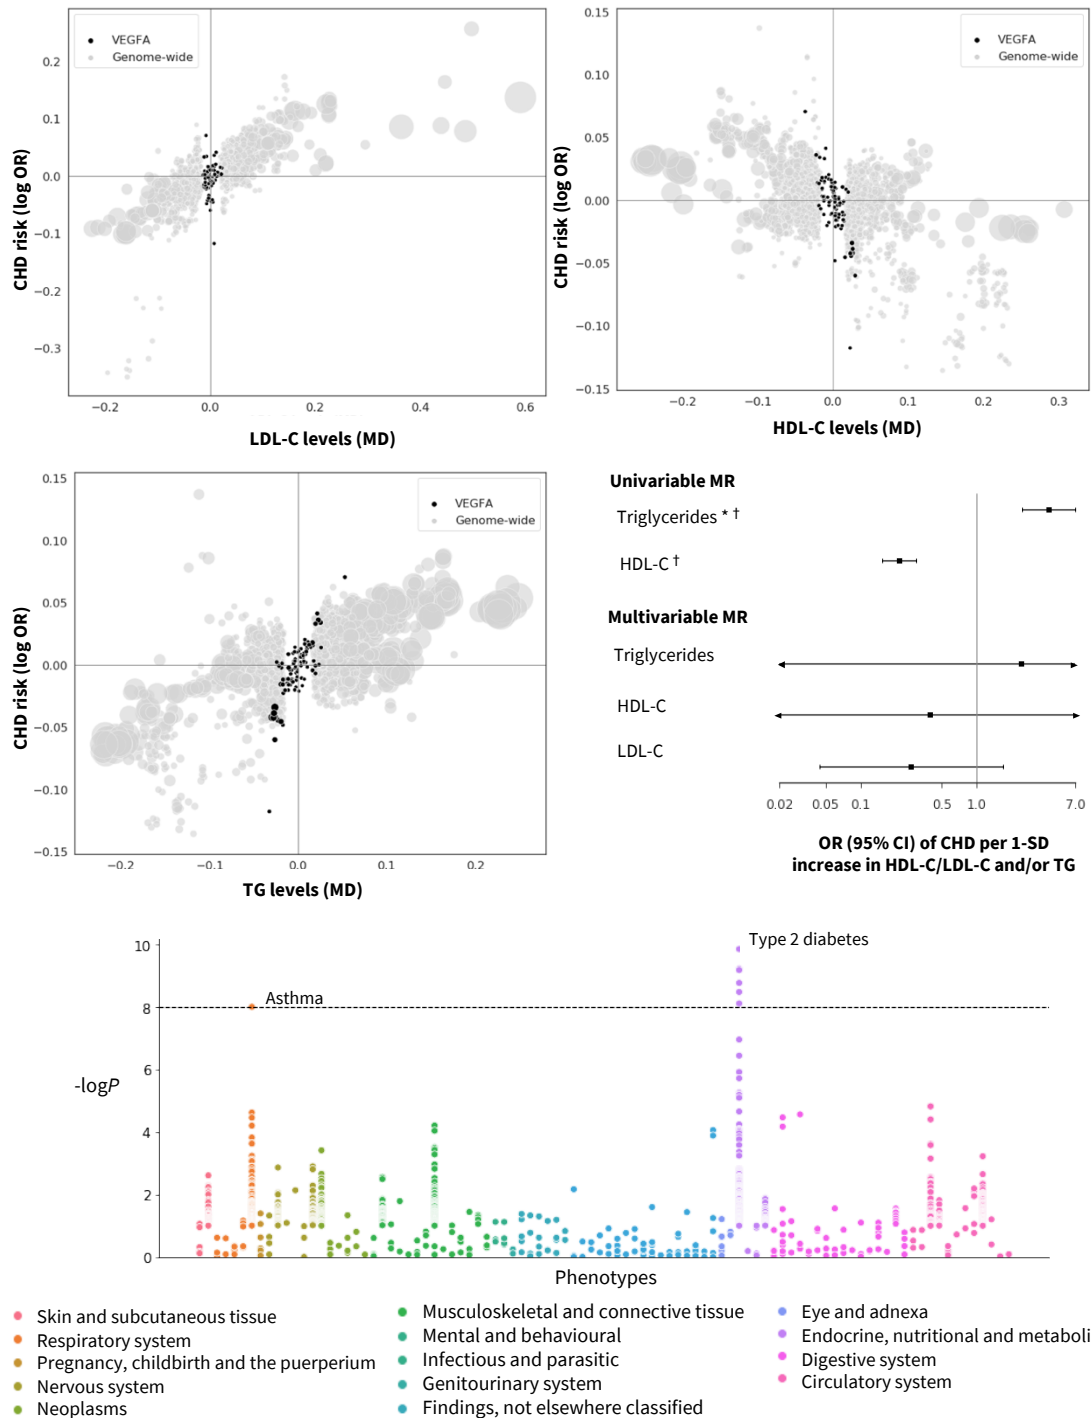

**Supplementary Figure 16. Prioritized target: VEGFA.** The top and middle left panels show genetic associations at the locus ( $\pm 50\text{kbp}$ ) in black vs genome-wide associations (grey,  $P$  value  $< 1 \times 10^{-6}$  based on two-sided z-tests). The x-axis shows the per allele effect on the corresponding lipid expressed as mean difference (MD) from GLGC and the y-axis indicates the per allele effect on CHD expressed as log odds ratios (OR) from CardiogramPlusC4D. The marker size indicates the significance of the association with the lipid sub-fraction ( $P$ -value). The middle right panel shows the result of the univariable and multivariable (drug target) *cis*-MR results presented as OR and 95% confidence intervals with lipid exposure ( $n=188,577$  individuals) and CHD outcome ( $n= 60,801$  cases and 123,504 controls). ‘\*’ indicates the MR estimates as being replicated, and ‘†’ that the lipid effect and CHD signals are co-localized. The bottom panel shows disease associations at the locus with 102 clinical end points from UK Biobank and GWAS Consortia.

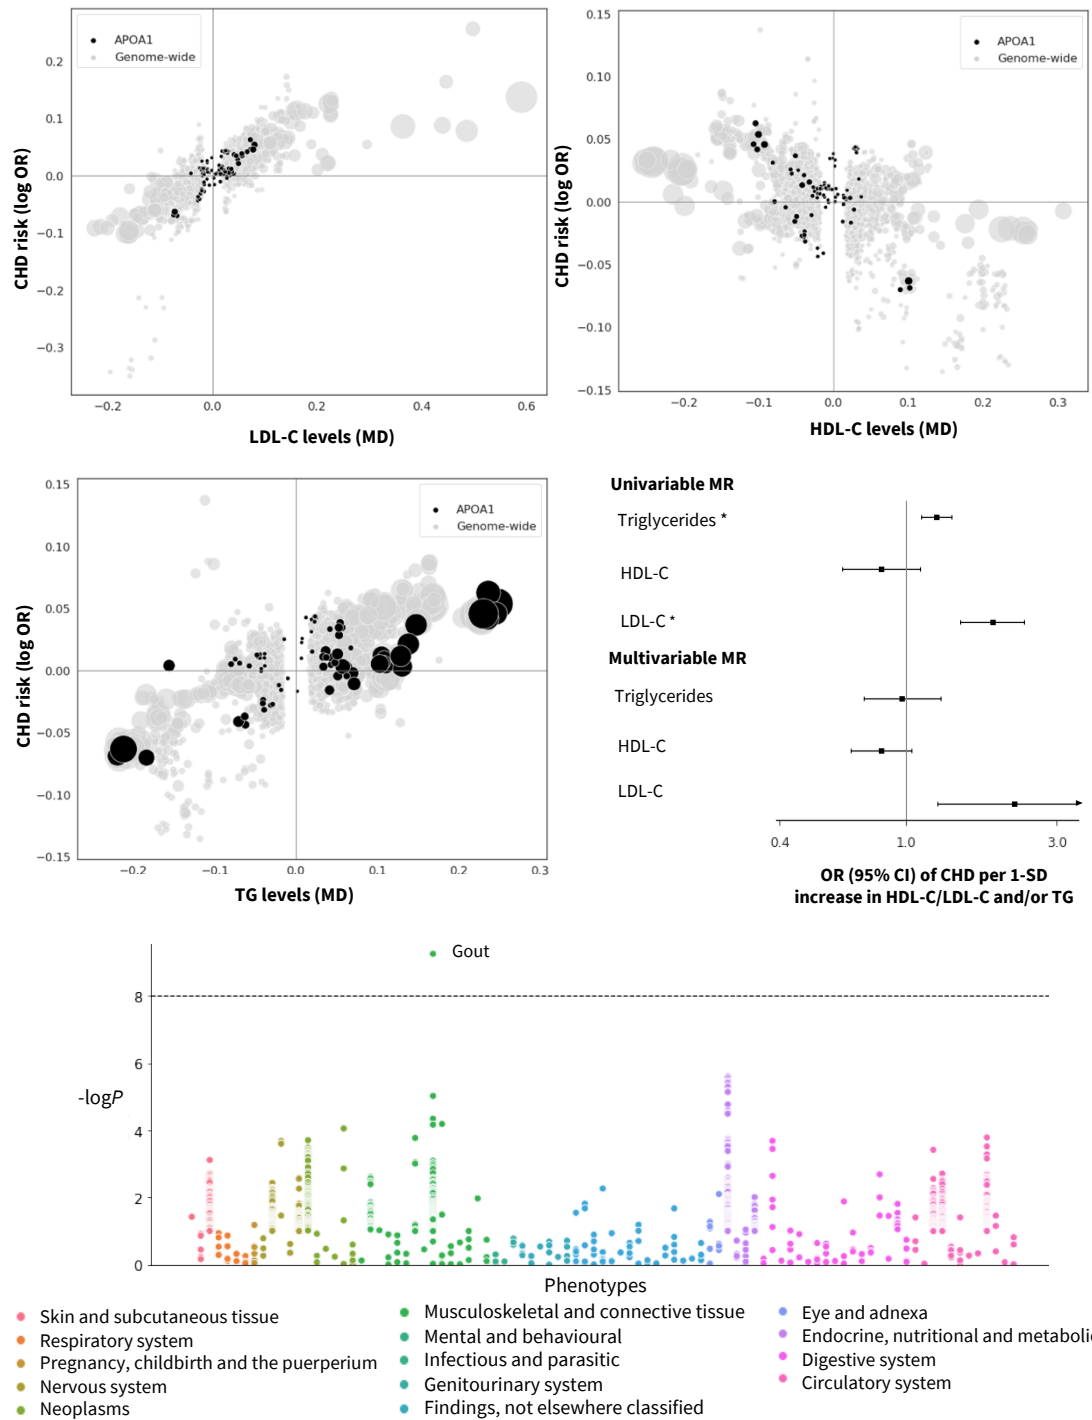

**Supplementary Figure 17. Prioritized target: APOA1.** The top and middle left panels show genetic associations at the locus ( $\pm 50\text{kbp}$ ) in black vs genome-wide associations (grey,  $P$  value  $< 1 \times 10^{-6}$  based on two-sided z-tests). The x-axis shows the per allele effect on the corresponding lipid expressed as mean difference (MD) from GLGC and the y-axis indicates the per allele effect on CHD expressed as log odds ratios (OR) from CardiogramPlusC4D. The marker size indicates the significance of the association with the lipid sub-fraction ( $P$ -value). The middle right panel shows the result of the univariable and multivariable (drug target) *cis*-MR results presented as OR and 95% confidence intervals with lipid exposure ( $n=188,577$  individuals) and CHD outcome ( $n= 60,801$  cases and 123,504 controls). ‘\*’ indicates the MR estimates as being replicated, and ‘†’ that the lipid effect and CHD signals are co-localized. The bottom panel shows disease associations at the locus with 102 clinical end points from UK Biobank and GWAS Consortia.

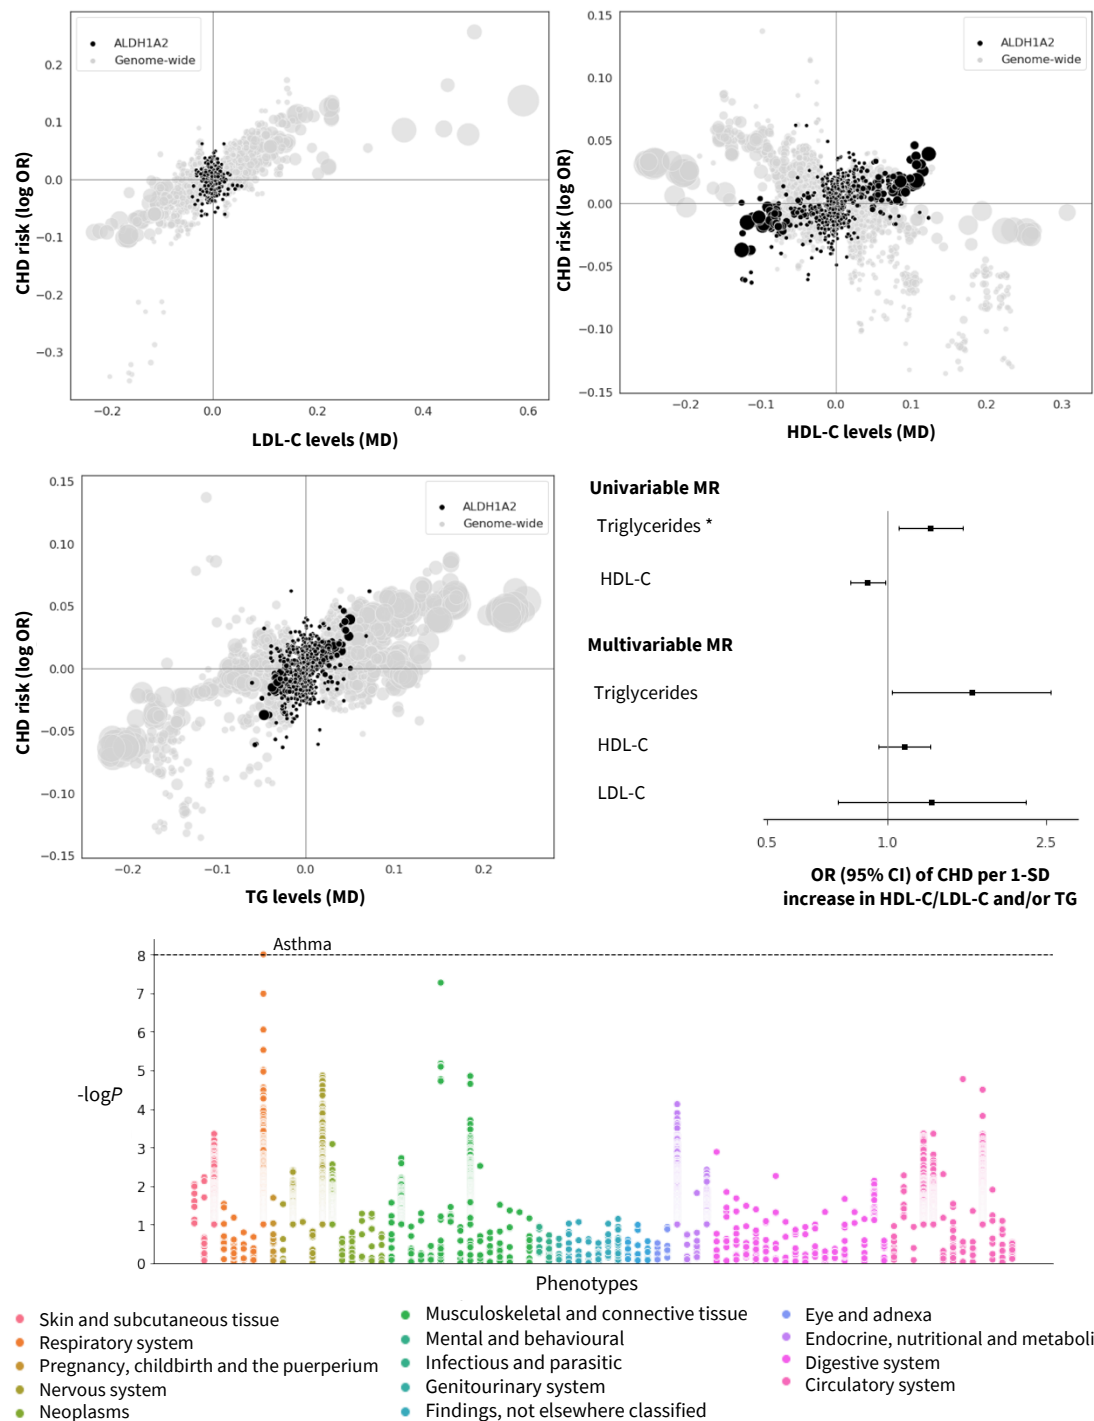

**Supplementary Figure 18. Prioritized target: ALDH1A2.** The top and middle left panels show genetic associations at the locus ( $\pm 50$ kbp) in black vs genome-wide associations (grey,  $P$  value  $< 1 \times 10^{-6}$  based on two-sided z-tests). The x-axis shows the per allele effect on the corresponding lipid expressed as mean difference (MD) from GLGC and the y-axis indicates the per allele effect on CHD expressed as log odds ratios (OR) from CardiogramPlusC4D. The marker size indicates the significance of the association with the lipid sub-fraction ( $P$ -value). The middle right panel shows the result of the univariable and multivariable (drug target) *cis*-MR results presented as OR and 95% confidence intervals with lipid exposure ( $n=188,577$  individuals) and CHD outcome ( $n= 60,801$  cases and 123,504 controls). ‘\*’ indicates the MR estimates as being replicated, and ‘†’ that the lipid effect and CHD signals are co-localized. The bottom panel shows disease associations at the locus with 102 clinical end points from UK Biobank and GWAS Consortia.

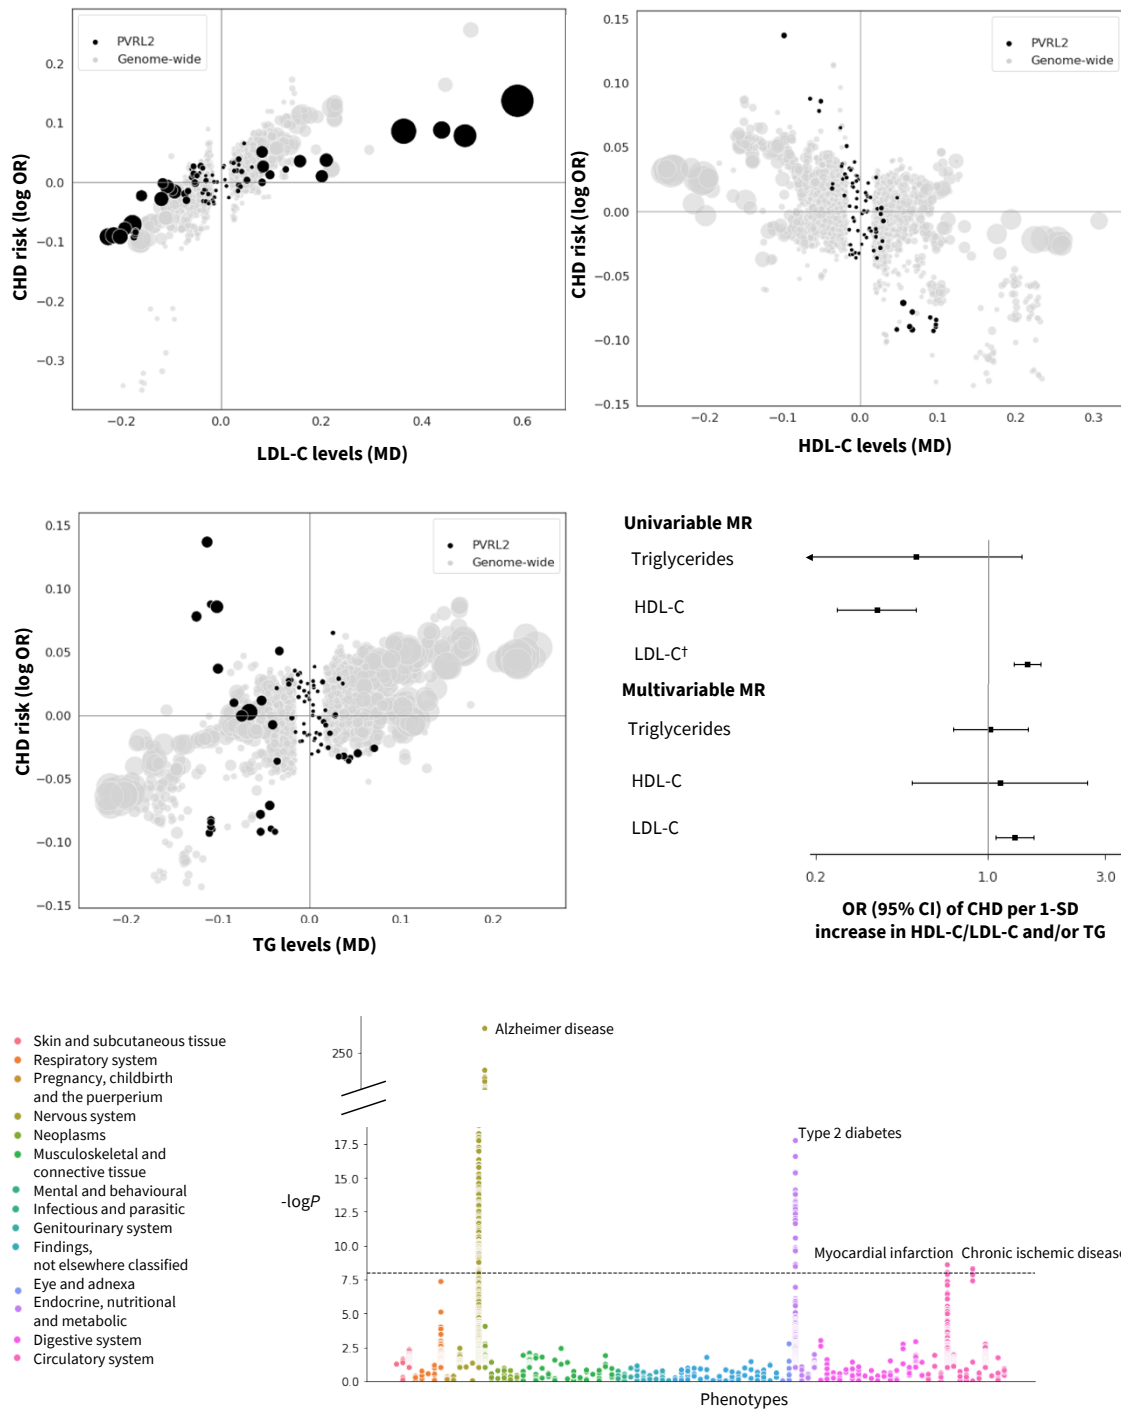

**Supplementary Figure 19. Prioritized target: PVRL2.** The top and middle left panels show genetic associations at the locus ( $\pm 50\text{kbp}$ ) in black vs genome-wide associations (grey,  $P$  value  $< 1 \times 10^{-6}$  based on two-sided z-tests). The x-axis shows the per allele effect on the corresponding lipid expressed as mean difference (MD) from GLGC and the y-axis indicates the per allele effect on CHD expressed as log odds ratios (OR) from CardiogramPlusC4D. The marker size indicates the significance of the association with the lipid sub-fraction ( $P$ -value). The middle right panel shows the result of the univariable and multivariable (drug target) *cis*-MR results presented as OR and 95% confidence intervals with lipid exposure ( $n=188,577$  individuals) and CHD outcome ( $n= 60,801$  cases and 123,504 controls). ‘\*’ indicates the MR estimates as being replicated, and ‘†’ that the lipid effect and CHD signals are co-localized. The bottom panel shows disease associations at the locus with 102 clinical end points from UK Biobank and GWAS Consortia.

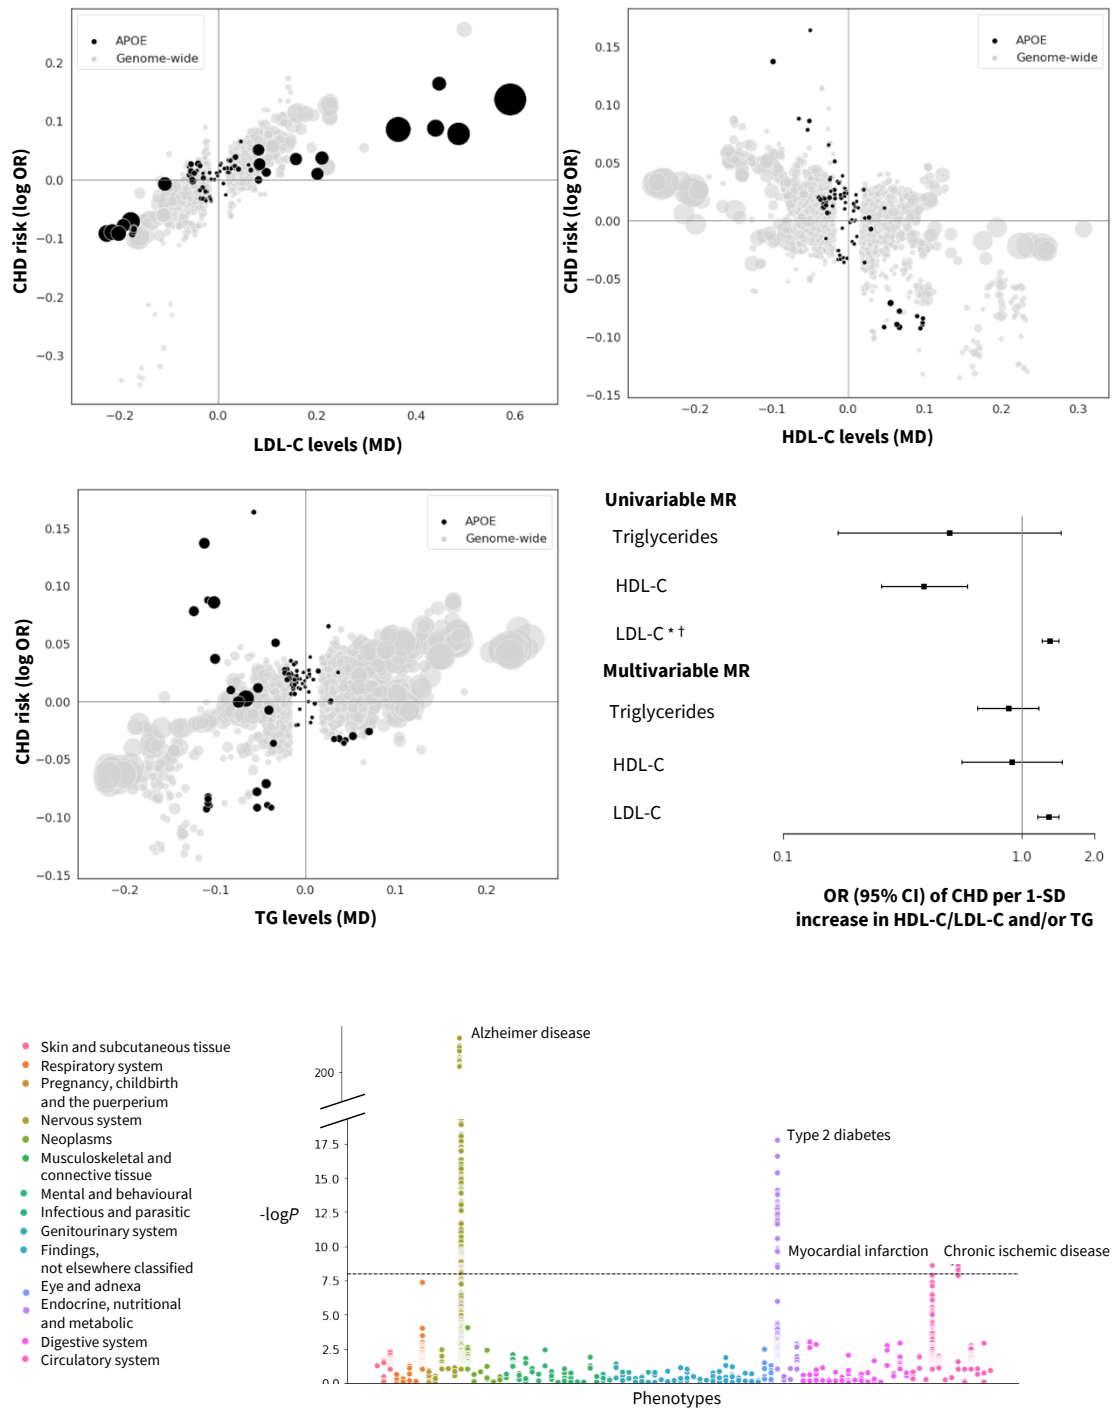

**Supplementary Figure 20. Prioritized target: APOE.** The top and middle left panels show genetic associations at the locus ( $\pm 50\text{kbp}$ ) in black vs genome-wide associations (grey,  $P$  value  $< 1 \times 10^{-6}$  based on two-sided z-tests). The x-axis shows the per allele effect on the corresponding lipid expressed as mean difference (MD) from GLGC and the y-axis indicates the per allele effect on CHD expressed as log odds ratios (OR) from CardiogramPlusC4D. The marker size indicates the significance of the association with the lipid sub-fraction ( $P$ -value). The middle right panel shows the result of the univariable and multivariable (drug target) *cis*-MR results presented as OR and 95% confidence intervals with lipid exposure ( $n=188,577$  individuals) and CHD outcome ( $n= 60,801$  cases and 123,504 controls). ‘\*’ indicates the MR estimates as being replicated, and ‘†’ that the lipid effect and CHD signals are co-localized. The bottom panel shows disease associations at the locus with 102 clinical end points from UK Biobank and GWAS Consortia.

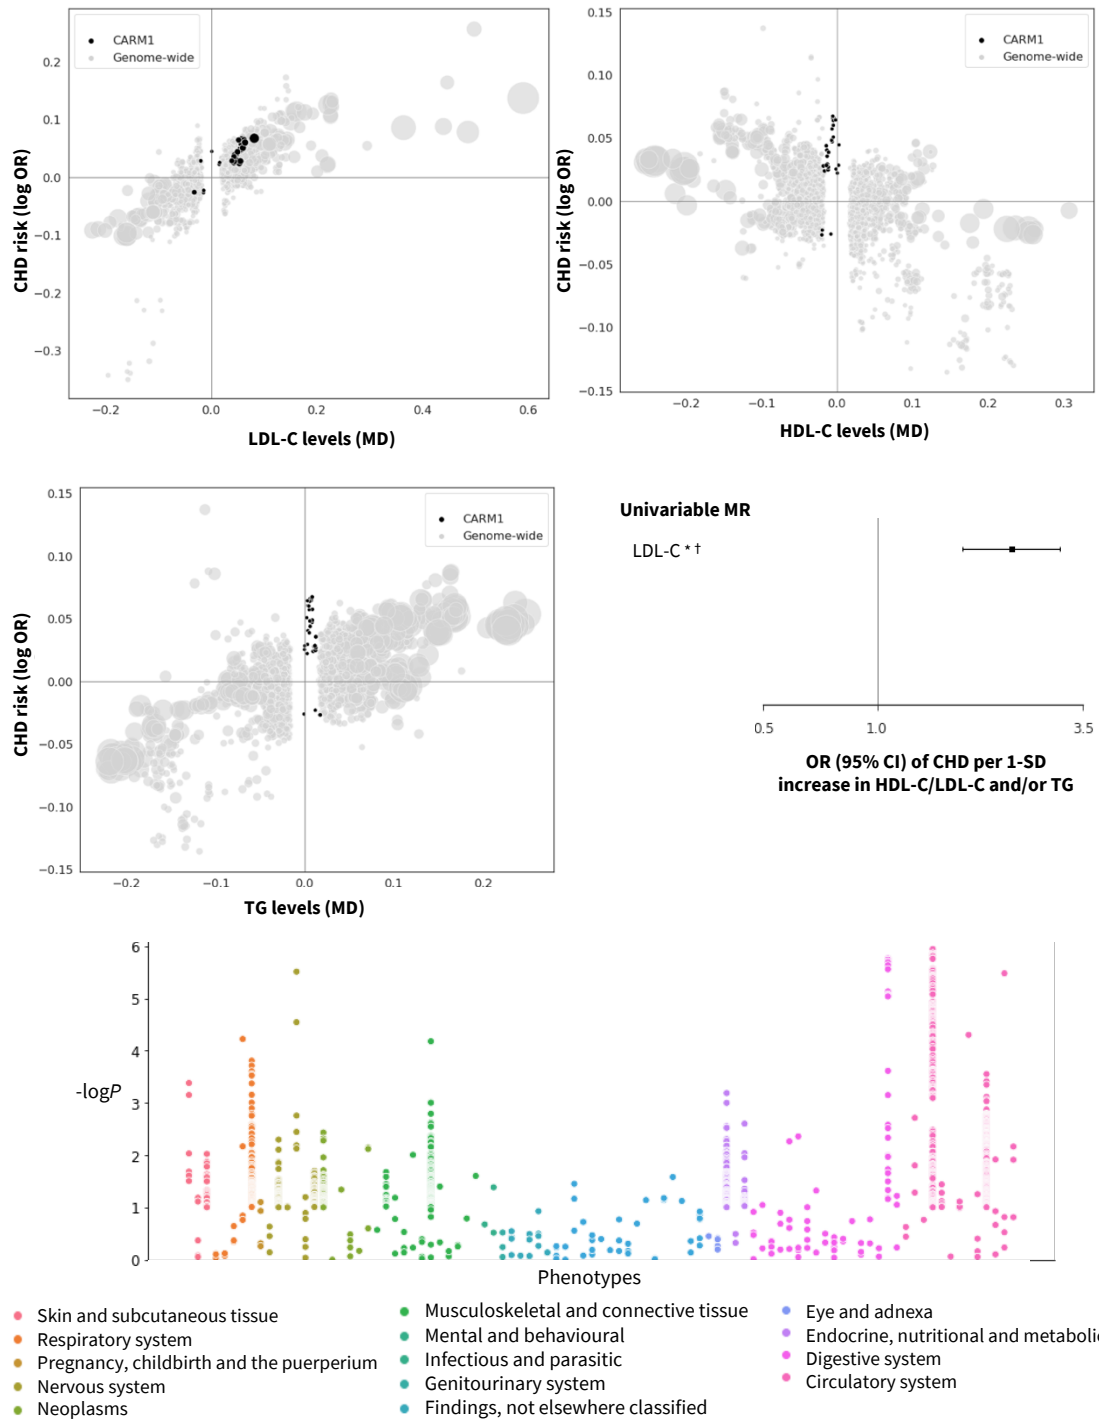

**Supplementary Figure 21. Prioritized target: CARM1.** The top and middle left panels show genetic associations at the locus ( $\pm 50\text{kbp}$ ) in black vs genome-wide associations (grey,  $P$  value  $< 1 \times 10^{-6}$  based on two-sided z-tests). The x-axis shows the per allele effect on the corresponding lipid expressed as mean difference (MD) from GLGC and the y-axis indicates the per allele effect on CHD expressed as log odds ratios (OR) from CardiogramPlusC4D. The marker size indicates the significance of the association with the lipid sub-fraction ( $P$ -value). The middle right panel shows the result of the univariable and multivariable (drug target) *cis*-MR results presented as OR and 95% confidence intervals with lipid exposure ( $n=188,577$  individuals) and CHD outcome ( $n= 60,801$  cases and 123,504 controls). ‘\*’ indicates the MR estimates as being replicated, and ‘†’ that the lipid effect and CHD signals are co-localized. The bottom panel shows disease associations at the locus with 102 clinical end points from UK Biobank and GWAS Consortia.

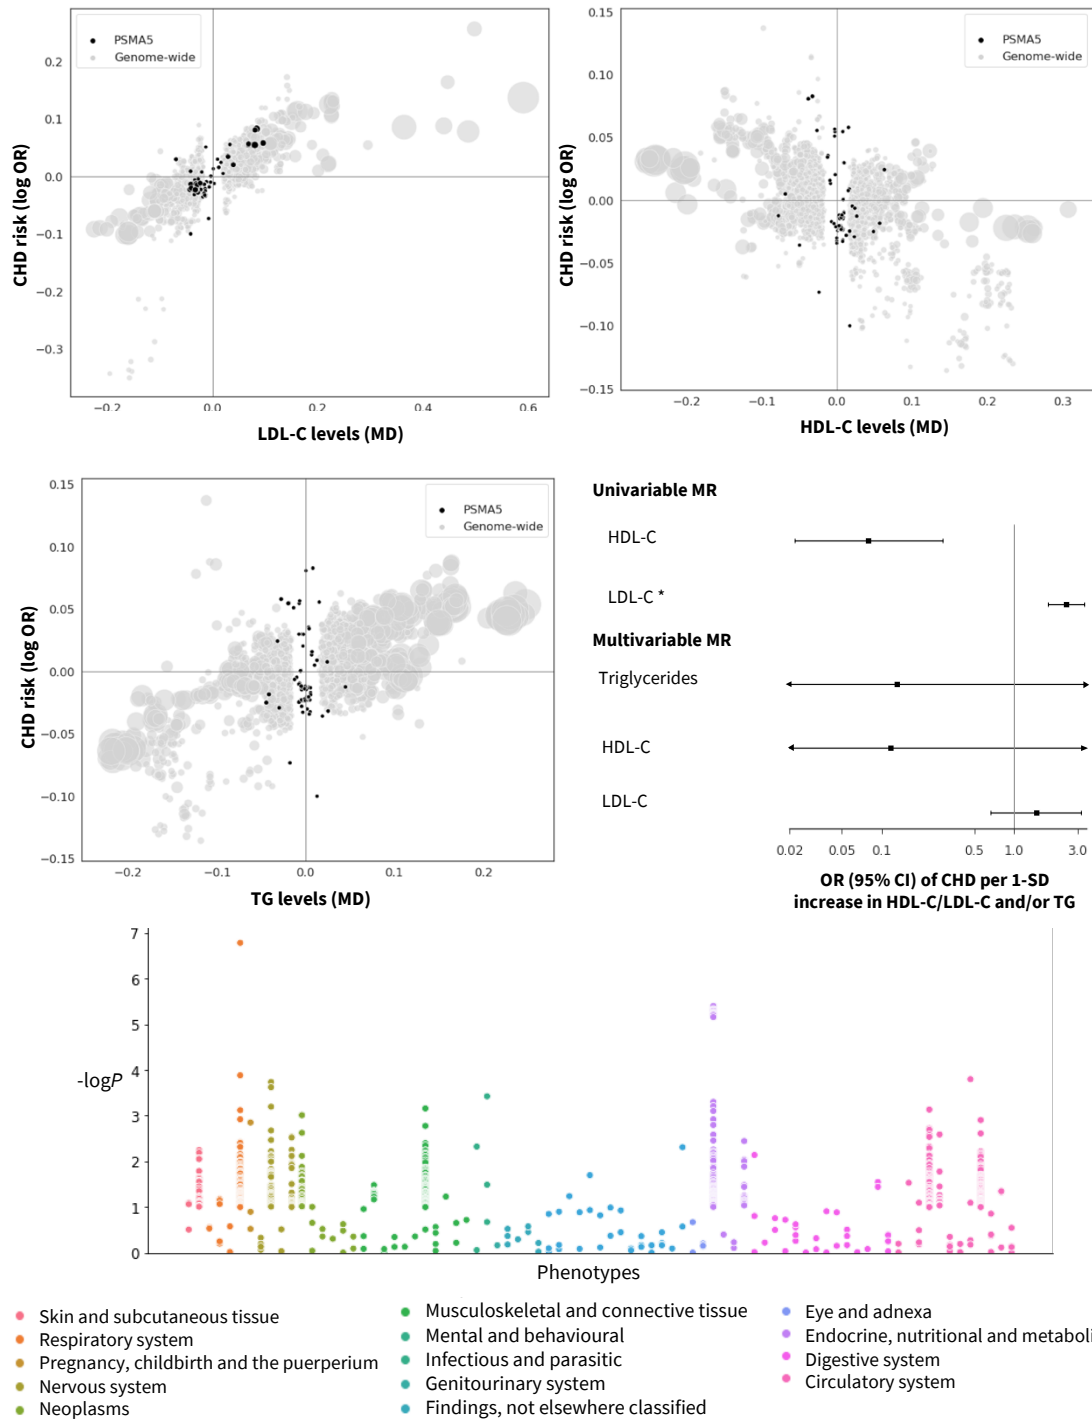

**Supplementary Figure 22. Prioritized target: PSMA5.** The top and middle left panels show genetic associations at the locus ( $\pm 50$ kb) in black vs genome-wide associations (grey,  $P$  value  $< 1 \times 10^{-6}$  based on two-sided z-tests). The x-axis shows the per allele effect on the corresponding lipid expressed as mean difference (MD) from GLGC and the y-axis indicates the per allele effect on CHD expressed as log odds ratios (OR) from CardiogramPlusC4D. The marker size indicates the significance of the association with the lipid sub-fraction ( $P$ -value). The middle right panel shows the result of the univariable and multivariable (drug target) *cis*-MR results presented as OR and 95% confidence intervals with lipid exposure ( $n=188,577$  individuals) and CHD outcome ( $n= 60,801$  cases and 123,504 controls). ‘\*’ indicates the MR estimates as being replicated, and ‘†’ that the lipid effect and CHD signals are co-localized. The bottom panel shows disease associations at the locus with 102 clinical end points from UK Biobank and GWAS Consortia.

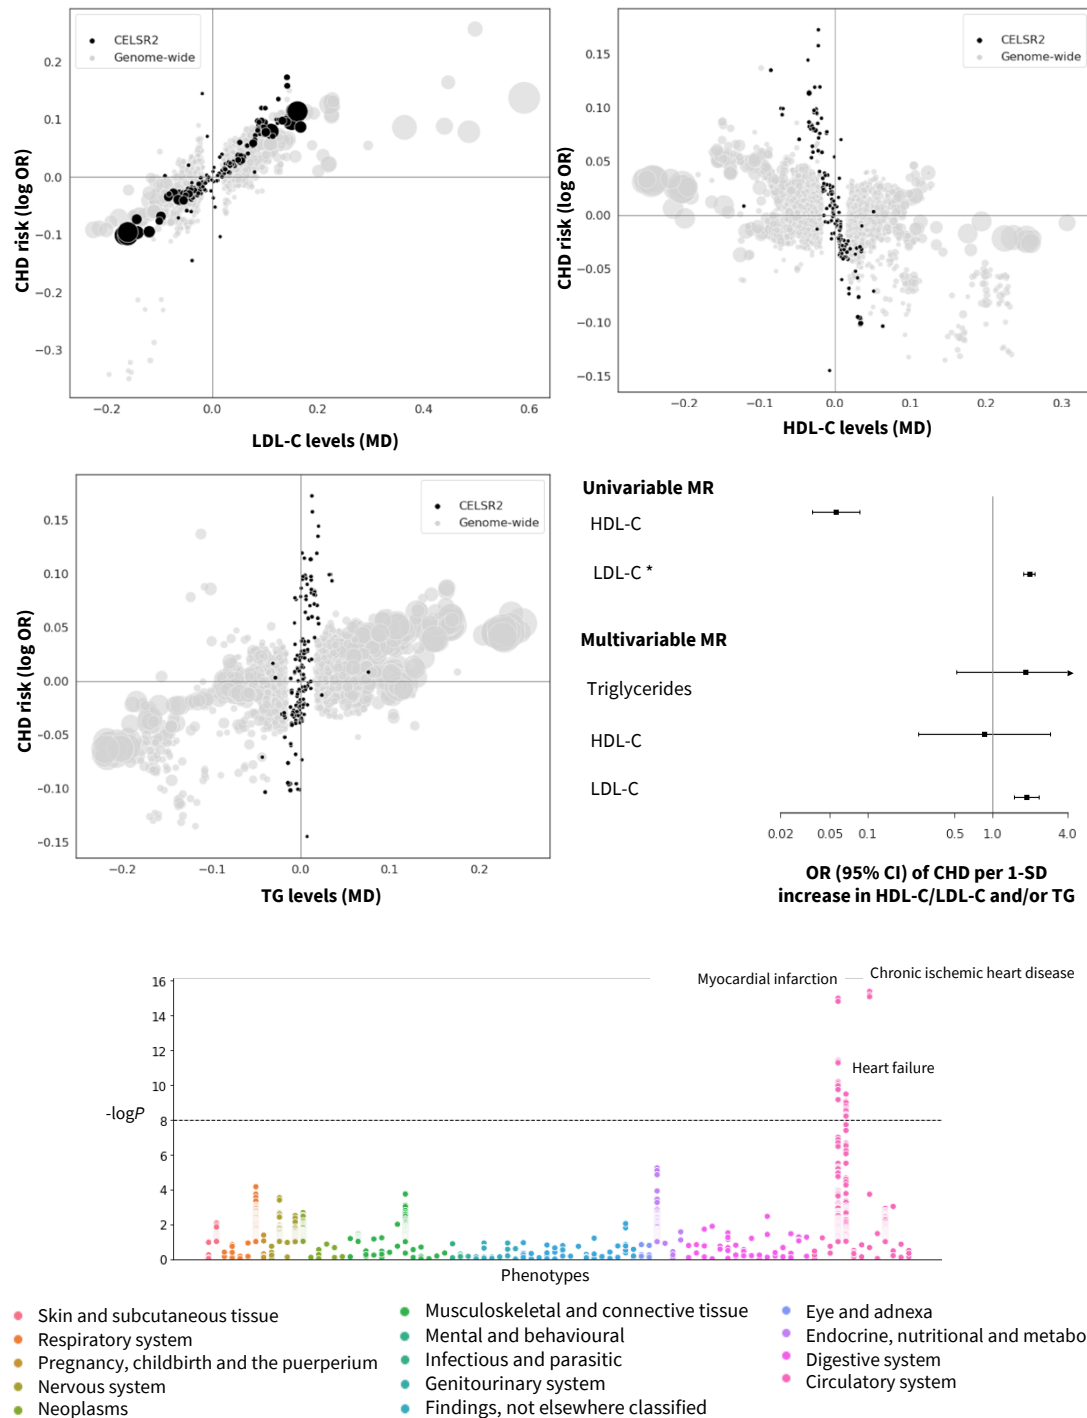

**Supplementary Figure 23. Prioritized target: CELSR2.** The top and middle left panels show genetic associations at the locus ( $\pm 50$ kbp) in black vs genome-wide associations (grey,  $P$  value  $< 1 \times 10^{-6}$  based on two-sided z-tests). The x-axis shows the per allele effect on the corresponding lipid expressed as mean difference (MD) from GLGC and the y-axis indicates the per allele effect on CHD expressed as log odds ratios (OR) from CardiogramPlusC4D. The marker size indicates the significance of the association with the lipid sub-fraction ( $P$ -value). The middle right panel shows the result of the univariable and multivariable (drug target) *cis*-MR results presented as OR and 95% confidence intervals with lipid exposure ( $n=188,577$  individuals) and CHD outcome ( $n= 60,801$  cases and 123,504 controls). ‘\*’ indicates the MR estimates as being replicated, and ‘†’ that the lipid effect and CHD signals are co-localized. The bottom panel shows disease associations at the locus with 102 clinical end points from UK Biobank and GWAS Consortia.



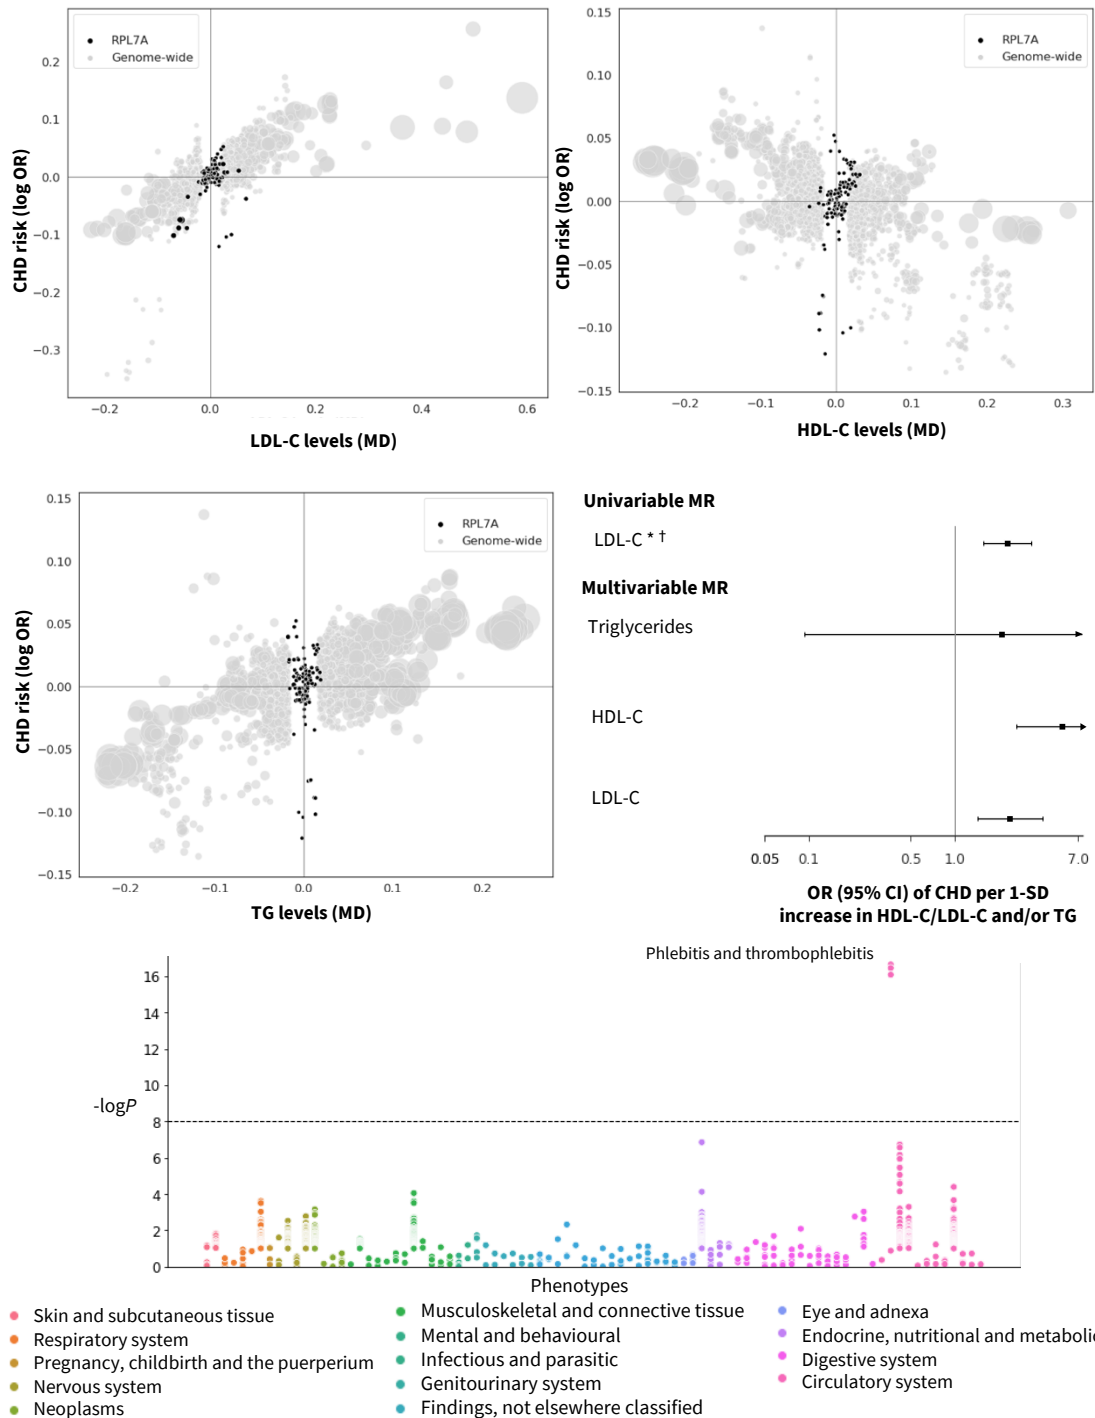

**Supplementary Figure 24. Prioritized target: RPL7A.** The top and middle left panels show genetic associations at the locus ( $\pm 50\text{kbp}$ ) in black vs genome-wide associations (grey,  $P$  value  $< 1 \times 10^{-6}$  based on two-sided z-tests). The x-axis shows the per allele effect on the corresponding lipid expressed as mean difference (MD) from GLGC and the y-axis indicates the per allele effect on CHD expressed as log odds ratios (OR) from CardiogramPlusC4D. The marker size indicates the significance of the association with the lipid sub-fraction ( $P$ -value). The middle right panel shows the result of the univariable and multivariable (drug target) *cis*-MR results presented as OR and 95% confidence intervals with lipid exposure ( $n=188,577$  individuals) and CHD outcome ( $n= 60,801$  cases and 123,504 controls). ‘\*’ indicates the MR estimates as being replicated, and ‘†’ that the lipid effect and CHD signals are co-localized. The bottom panel shows disease associations at the locus with 102 clinical end points from UK Biobank and GWAS Consortia.

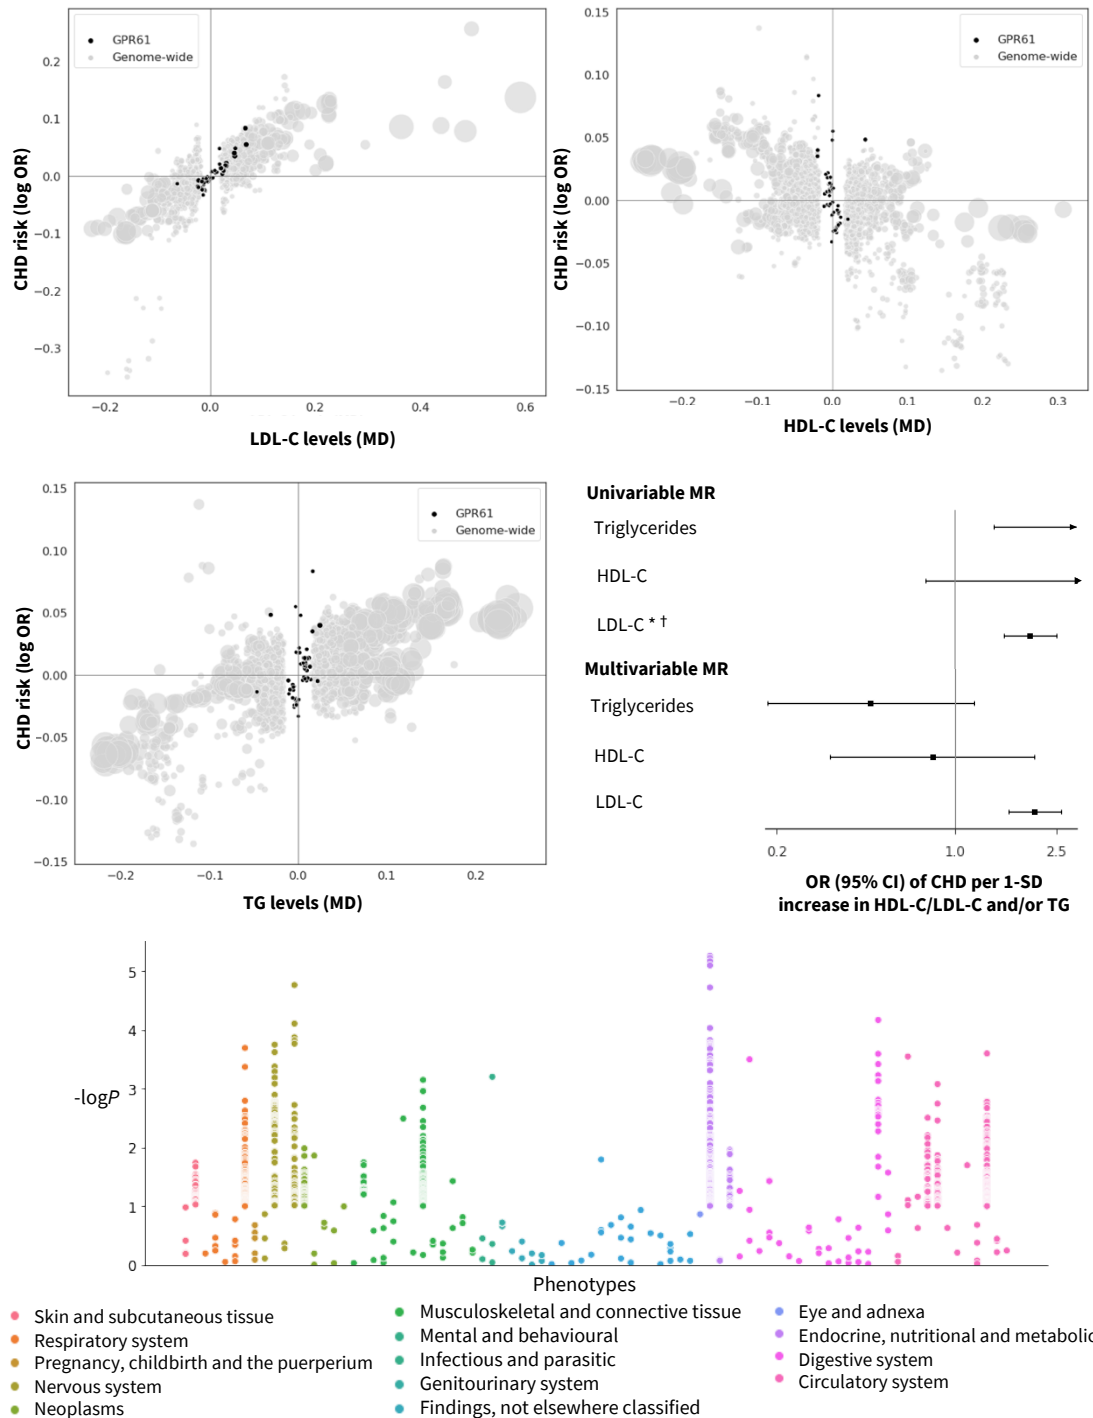

**Supplementary Figure 25. Prioritized target: GPR61.** The top and middle left panels show genetic associations at the locus ( $\pm 50$ kb) in black vs genome-wide associations (grey,  $P$  value  $< 1 \times 10^{-6}$  based on two-sided z-tests). The x-axis shows the per allele effect on the corresponding lipid expressed as mean difference (MD) from GLGC and the y-axis indicates the per allele effect on CHD expressed as log odds ratios (OR) from CardiogramPlusC4D. The marker size indicates the significance of the association with the lipid sub-fraction ( $P$ -value). The middle right panel shows the result of the univariable and multivariable (drug target) *cis*-MR results presented as OR and 95% confidence intervals with lipid exposure ( $n=188,577$  individuals) and CHD outcome ( $n= 60,801$  cases and 123,504 controls). ‘\*’ indicates the MR estimates as being replicated, and ‘†’ that the lipid effect and CHD signals are co-localized. The bottom panel shows disease associations at the locus with 102 clinical end points from UK Biobank and GWAS Consortia..

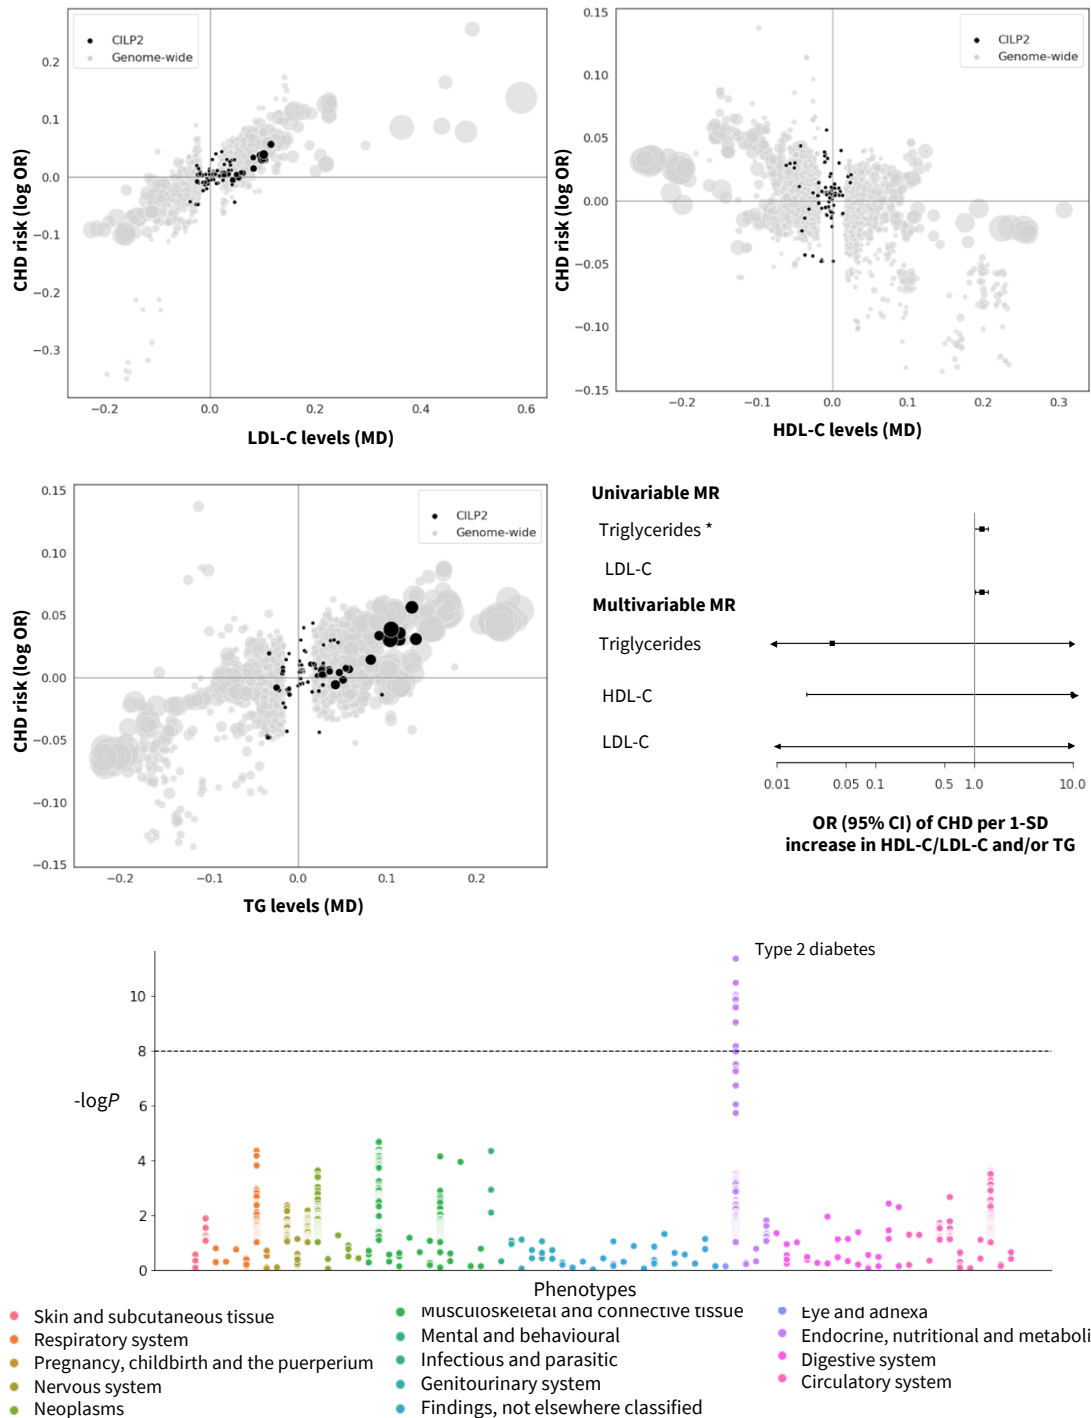

**Supplementary Figure 26. Prioritized target: CILP2.** The top and middle left panels show genetic associations at the locus ( $\pm 50\text{kbp}$ ) in black vs genome-wide associations (grey,  $P$  value  $< 1 \times 10^{-6}$  based on two-sided z-tests). The x-axis shows the per allele effect on the corresponding lipid expressed as mean difference (MD) from GLGC and the y-axis indicates the per allele effect on CHD expressed as log odds ratios (OR) from CardiogramPlusC4D. The marker size indicates the significance of the association with the lipid sub-fraction ( $P$ -value). The middle right panel shows the result of the univariable and multivariable (drug target) *cis*-MR results presented as OR and 95% confidence intervals with lipid exposure ( $n=188,577$  individuals) and CHD outcome ( $n= 60,801$  cases and 123,504 controls). ‘\*’ indicates the MR estimates as being replicated, and ‘†’ that the lipid effect and CHD signals are co-localized. The bottom panel shows disease associations at the locus with 102 clinical end points from UK Biobank and GWAS Consortia.

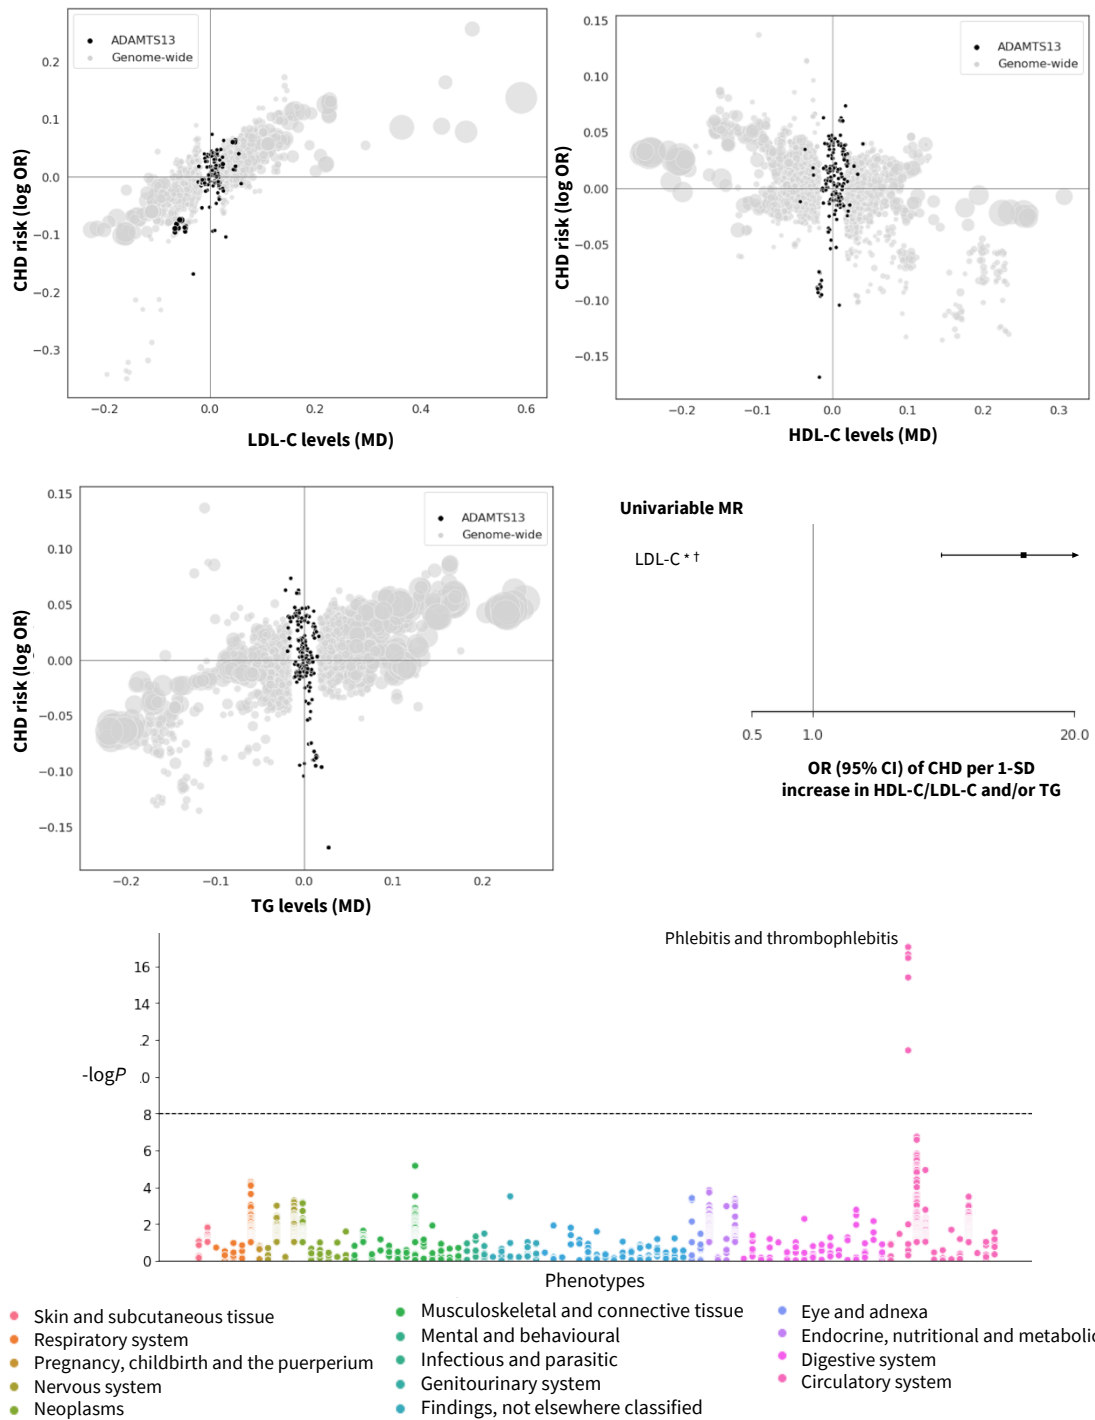

**Supplementary Figure 27. Prioritized target: ADAMTS13.** The top and middle left panels show genetic associations at the locus ( $\pm 50\text{kbp}$ ) in black vs genome-wide associations (grey,  $P$  value  $< 1 \times 10^{-6}$  based on two-sided z-tests). The x-axis shows the per allele effect on the corresponding lipid expressed as mean difference (MD) from GLGC and the y-axis indicates the per allele effect on CHD expressed as log odds ratios (OR) from CardiogramPlusC4D. The marker size indicates the significance of the association with the lipid sub-fraction ( $P$ -value). The middle right panel shows the result of the univariable and multivariable (drug target) *cis*-MR results presented as OR and 95% confidence intervals with lipid exposure ( $n=188,577$  individuals) and CHD outcome ( $n= 60,801$  cases and 123,504 controls). ‘\*’ indicates the MR estimates as being replicated, and ‘†’ that the lipid effect and CHD signals are co-localized. The bottom panel shows disease associations at the locus with 102 clinical end points from UK Biobank and GWAS Consortia.

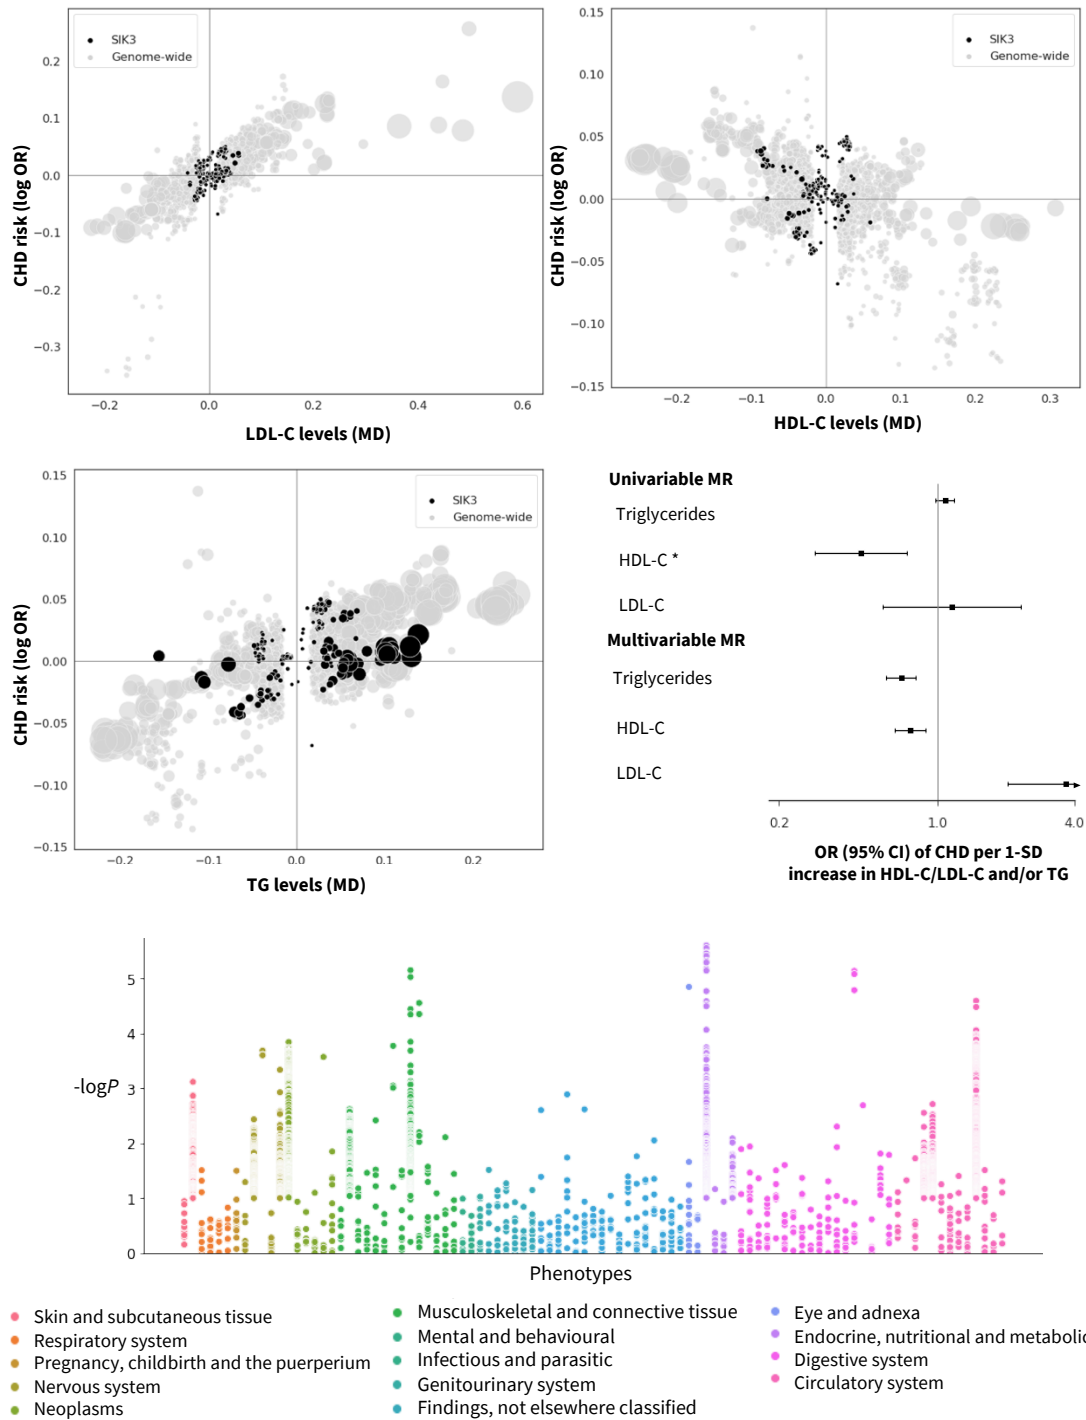

**Supplementary Figure 28. Prioritized target: SIK3.** The top and middle left panels show genetic associations at the locus ( $\pm 50\text{kbp}$ ) in black vs genome-wide associations (grey,  $P$  value  $< 1 \times 10^{-6}$  based on two-sided z-tests). The x-axis shows the per allele effect on the corresponding lipid expressed as mean difference (MD) from GLGC and the y-axis indicates the per allele effect on CHD expressed as log odds ratios (OR) from CardiogramPlusC4D. The marker size indicates the significance of the association with the lipid sub-fraction ( $P$ -value). The middle right panel shows the result of the univariable and multivariable (drug target) *cis*-MR results presented as OR and 95% confidence intervals with lipid exposure ( $n=188,577$  individuals) and CHD outcome ( $n= 60,801$  cases and 123,504 controls). ‘\*’ indicates the MR estimates as being replicated, and ‘†’ that the lipid effect and CHD signals are co-localized. The bottom panel shows disease associations at the locus with 102 clinical end points from UK Biobank and GWAS Consortia.

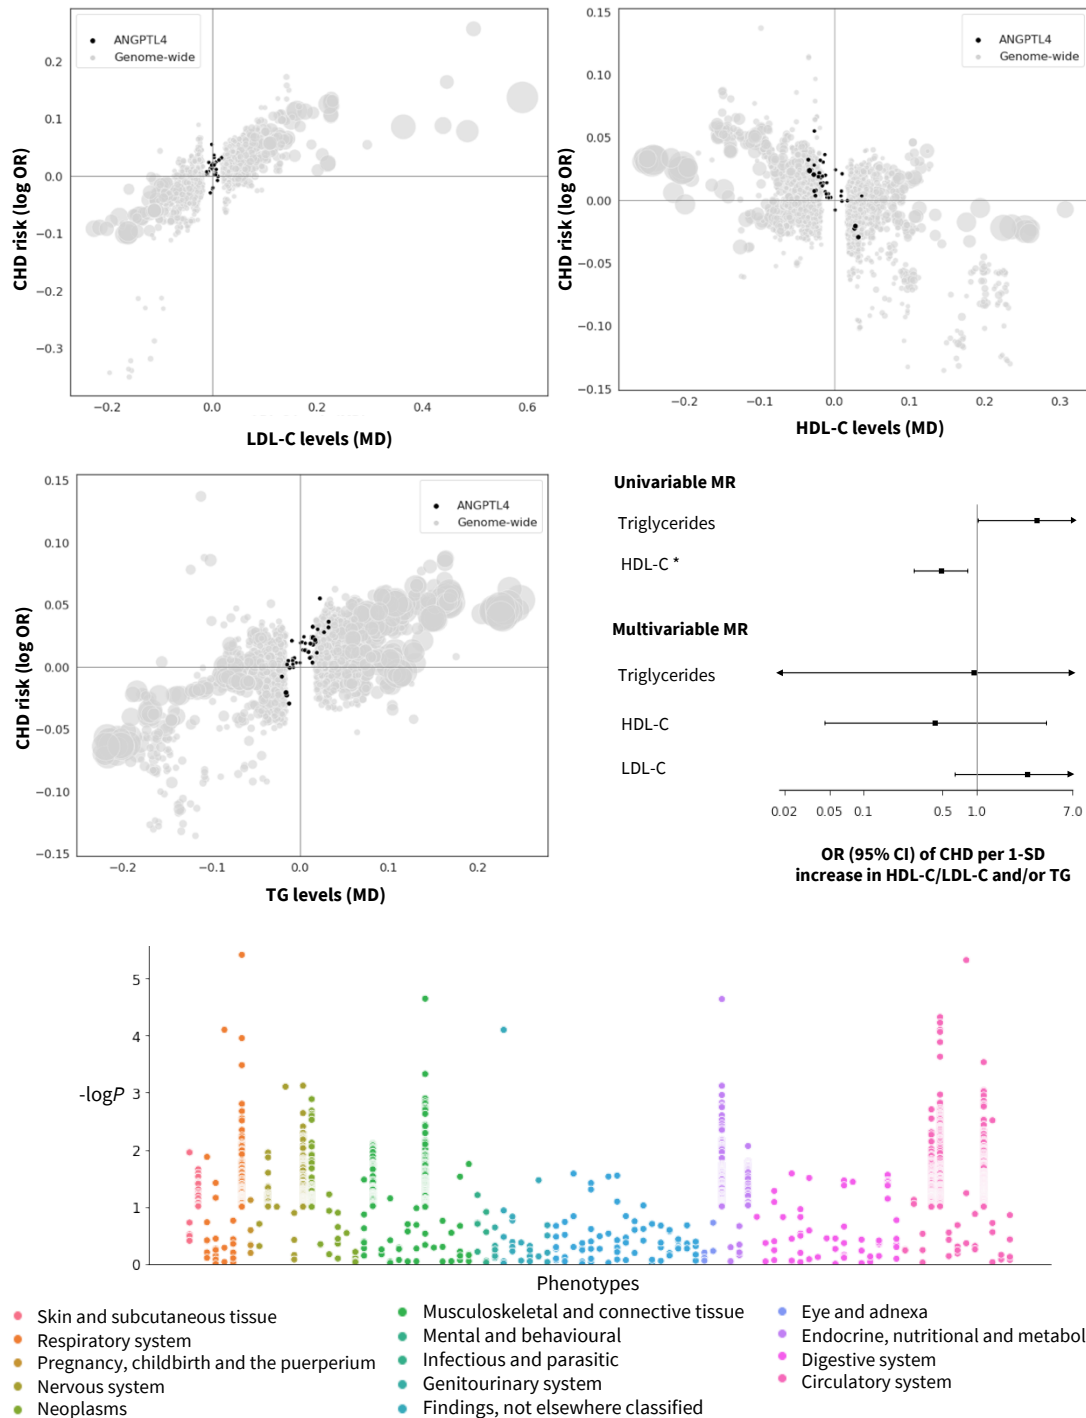

**Supplementary Figure 29. Prioritized target: ANGPTL4.** The top and middle left panels show genetic associations at the locus ( $\pm 50\text{kbp}$ ) in black vs genome-wide associations (grey,  $P$  value  $< 1 \times 10^{-6}$  based on two-sided z-tests). The x-axis shows the per allele effect on the corresponding lipid expressed as mean difference (MD) from GLGC and the y-axis indicates the per allele effect on CHD expressed as log odds ratios (OR) from CardiogramPlusC4D. The marker size indicates the significance of the association with the lipid sub-fraction ( $P$ -value). The middle right panel shows the result of the univariable and multivariable (drug target) *cis*-MR results presented as OR and 95% confidence intervals with lipid exposure ( $n=188,577$  individuals) and CHD outcome ( $n= 60,801$  cases and 123,504 controls). ‘\*’ indicates the MR estimates as being replicated, and ‘†’ that the lipid effect and CHD signals are co-localized. The bottom panel shows disease associations at the locus with 102 clinical end points from UK Biobank and GWAS Consortia.

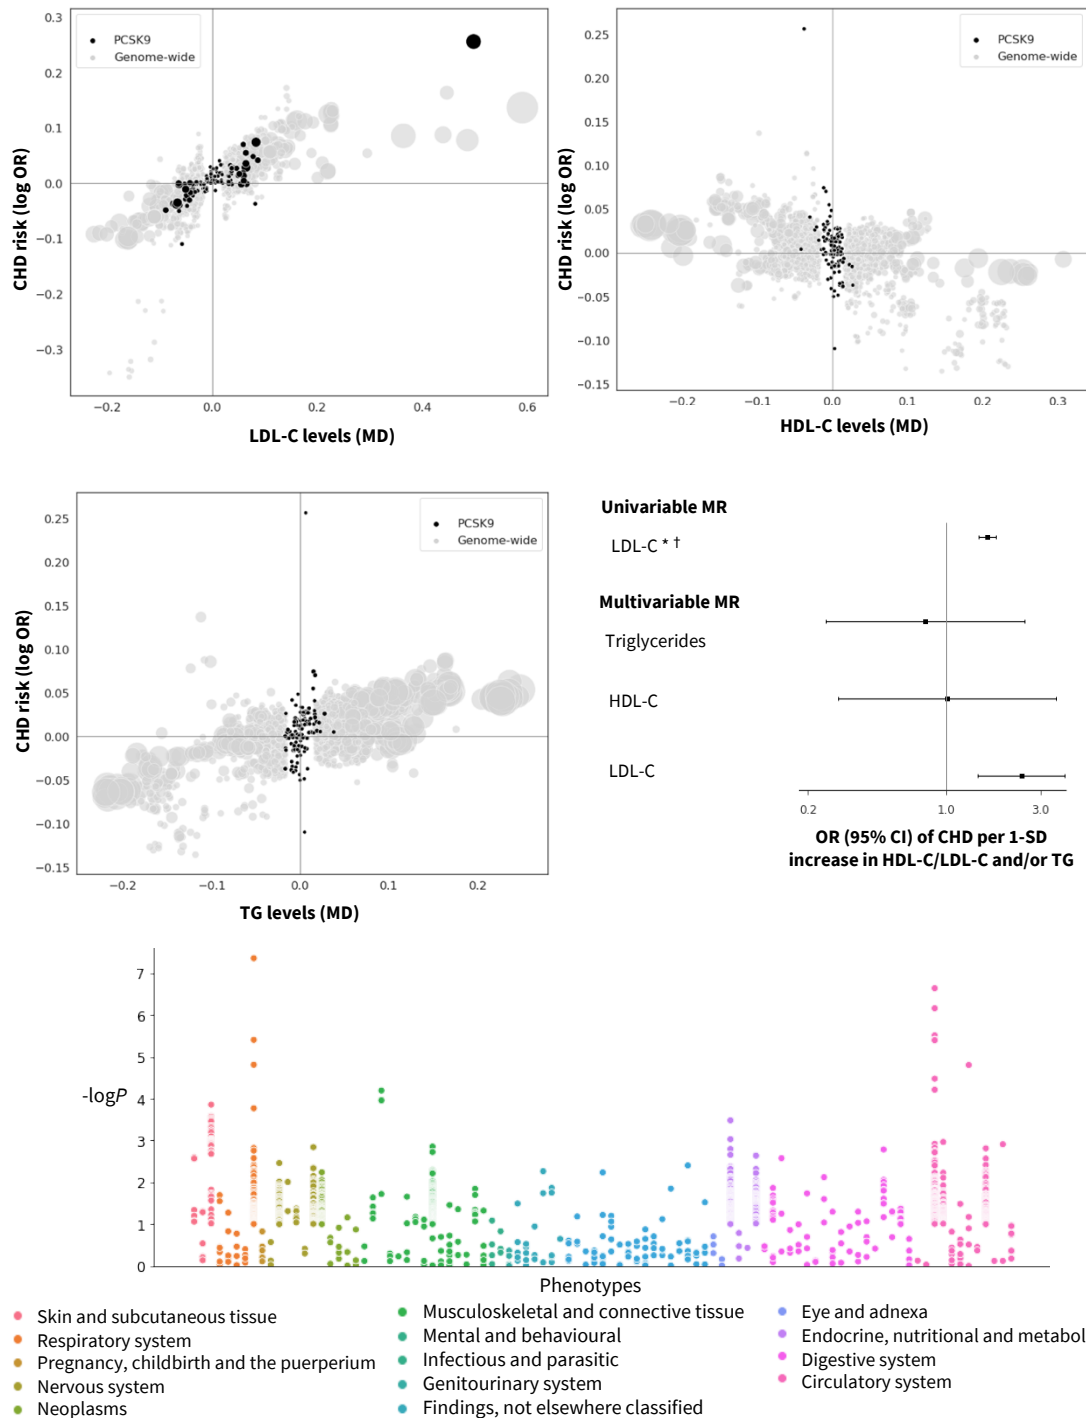

**Supplementary Figure 30. Prioritized target: PCSK9.** The top and middle left panels show genetic associations at the locus ( $\pm 50\text{kbp}$ ) in black vs genome-wide associations (grey,  $P$  value  $< 1 \times 10^{-6}$  based on two-sided z-tests). The x-axis shows the per allele effect on the corresponding lipid expressed as mean difference (MD) from GLGC and the y-axis indicates the per allele effect on CHD expressed as log odds ratios (OR) from CardiogramPlusC4D. The marker size indicates the significance of the association with the lipid sub-fraction ( $P$ -value). The middle right panel shows the result of the univariable and multivariable (drug target) *cis*-MR results presented as OR and 95% confidence intervals with lipid exposure ( $n=188,577$  individuals) and CHD outcome ( $n= 60,801$  cases and 123,504 controls). ‘\*’ indicates the MR estimates as being replicated, and ‘†’ that the lipid effect and CHD signals are co-localized. The bottom panel shows disease associations at the locus with 102 clinical end points from UK Biobank and GWAS Consortia.

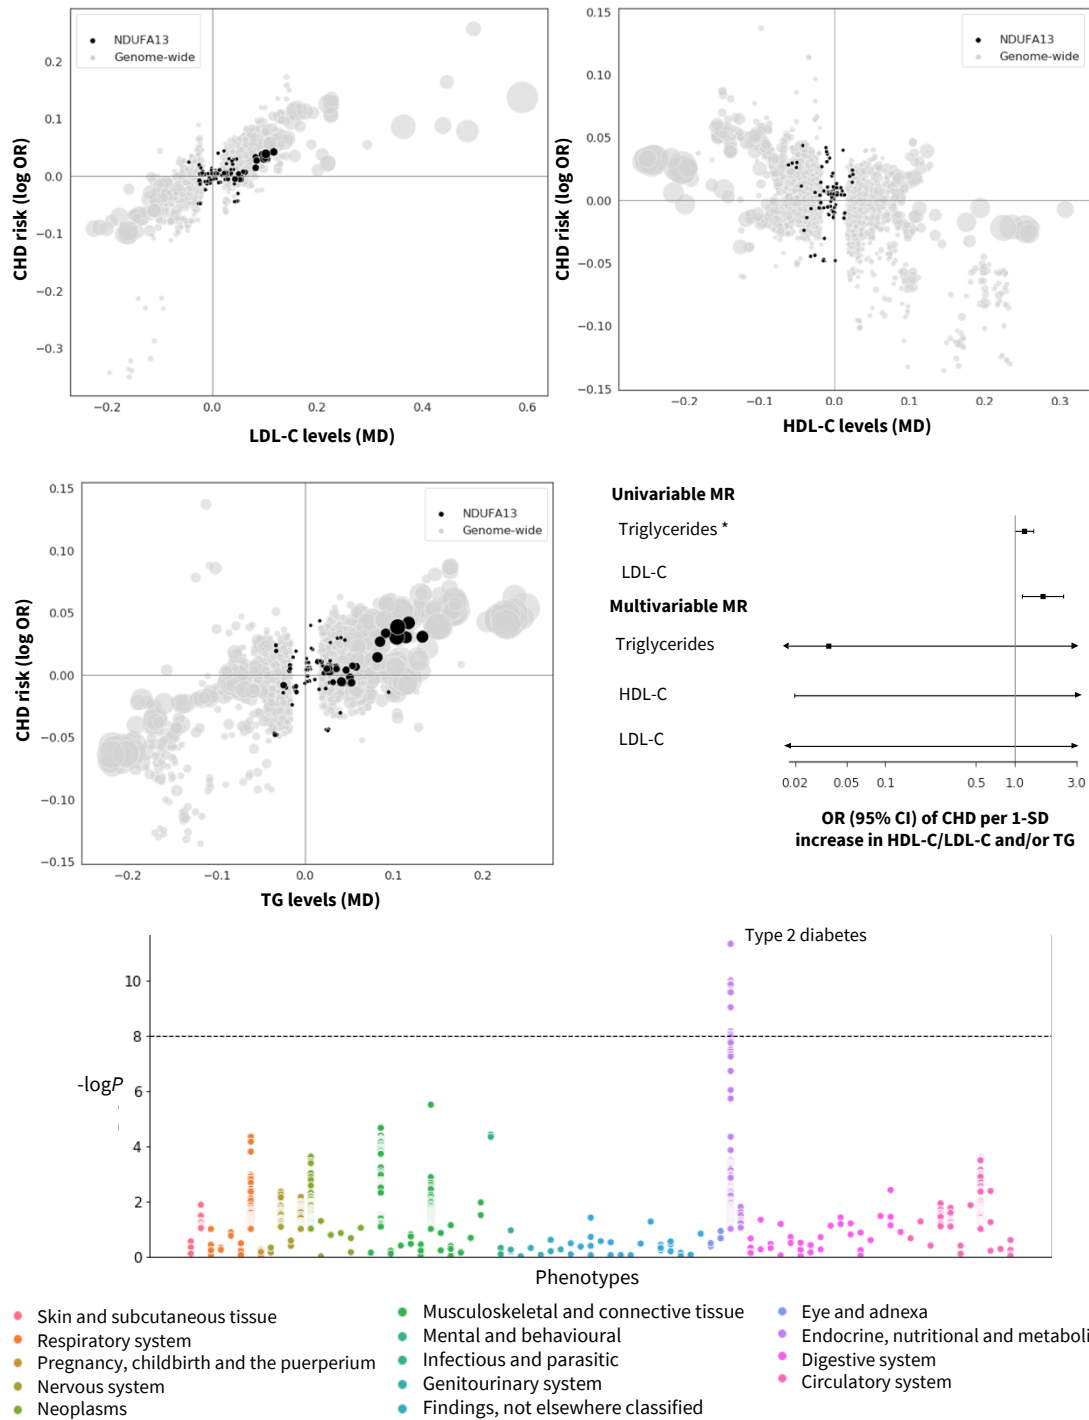

**Supplementary Figure 31. Prioritized target: NDUFA13.** The top and middle left panels show genetic associations at the locus ( $\pm 50$ kbp) in black vs genome-wide associations (grey,  $P$  value  $< 1 \times 10^{-6}$  based on two-sided z-tests). The x-axis shows the per allele effect on the corresponding lipid expressed as mean difference (MD) from GLGC and the y-axis indicates the per allele effect on CHD expressed as log odds ratios (OR) from CardiogramPlusC4D. The marker size indicates the significance of the association with the lipid sub-fraction ( $P$ -value). The middle right panel shows the result of the univariable and multivariable (drug target) *cis*-MR results presented as OR and 95% confidence intervals with lipid exposure ( $n=188,577$  individuals) and CHD outcome ( $n= 60,801$  cases and 123,504 controls). ‘\*’ indicates the MR estimates as being replicated, and ‘†’ that the lipid effect and CHD signals are co-localized. The bottom panel shows disease associations at the locus with 102 clinical end points from UK Biobank and GWAS Consortia.



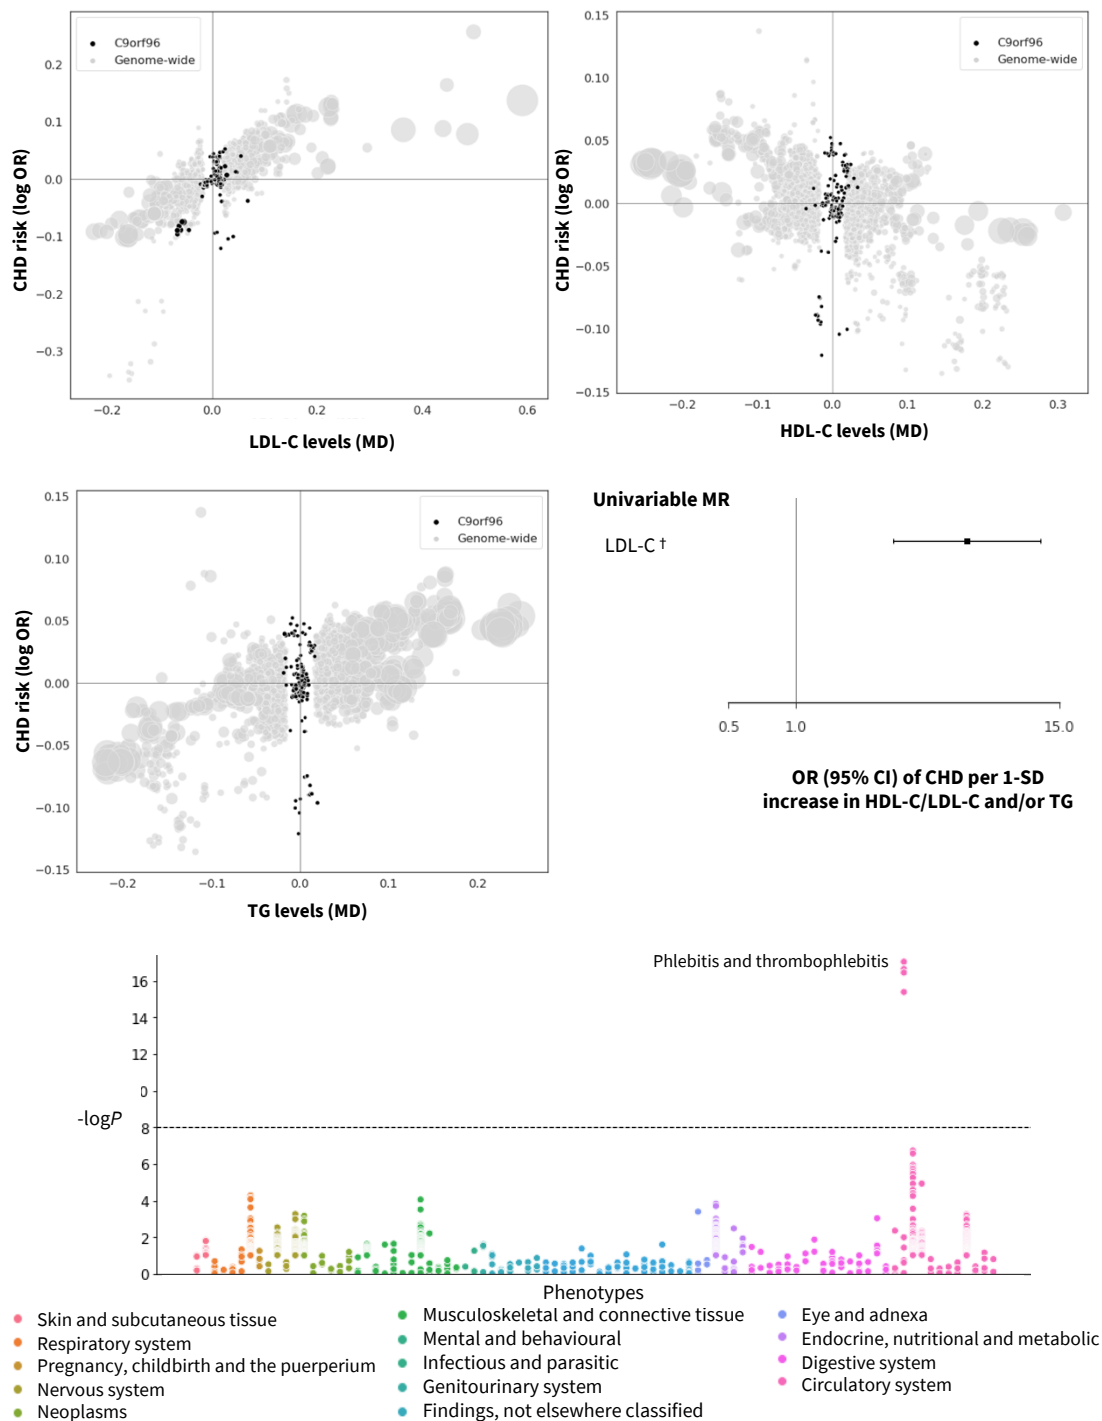

**Supplementary Figure 32. Prioritized target: C9orf96.** The top and middle left panels show genetic associations at the locus ( $\pm 50\text{kbp}$ ) in black vs genome-wide associations (grey,  $P$  value  $< 1 \times 10^{-6}$  based on two-sided z-tests). The x-axis shows the per allele effect on the corresponding lipid expressed as mean difference (MD) from GLGC and the y-axis indicates the per allele effect on CHD expressed as log odds ratios (OR) from CardiogramPlusC4D. The marker size indicates the significance of the association with the lipid sub-fraction ( $P$ -value). The middle right panel shows the result of the univariable and multivariable (drug target) *cis*-MR results presented as OR and 95% confidence intervals with lipid exposure ( $n=188,577$  individuals) and CHD outcome ( $n= 60,801$  cases and  $123,504$  controls). ‘\*’ indicates the MR estimates as being replicated, and ‘†’ that the lipid effect and CHD signals are co-localized. The bottom panel shows disease associations at the locus with 102 clinical end points from UK Biobank and GWAS Consortia.

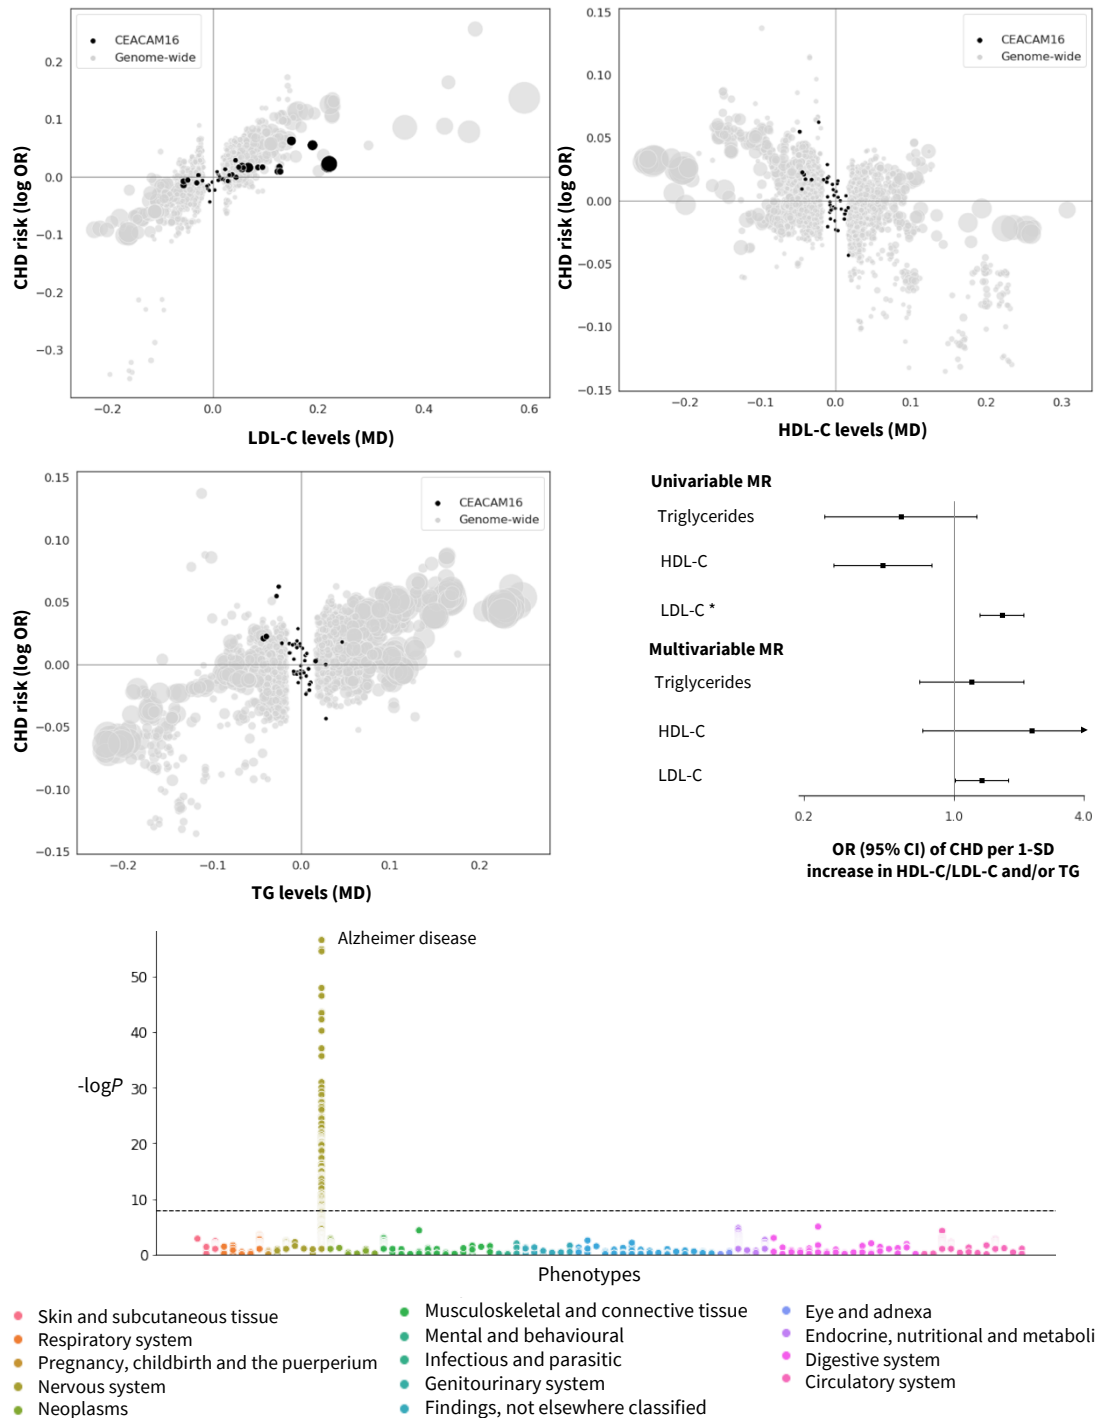

**Supplementary Figure 33. Prioritized target: CEACAM16.** The top and middle left panels show genetic associations at the locus ( $\pm 50\text{kbp}$ ) in black vs genome-wide associations (grey,  $P$  value  $< 1 \times 10^{-6}$  based on two-sided z-tests). The x-axis shows the per allele effect on the corresponding lipid expressed as mean difference (MD) from GLGC and the y-axis indicates the per allele effect on CHD expressed as log odds ratios (OR) from CardiogramPlusC4D. The marker size indicates the significance of the association with the lipid sub-fraction ( $P$ -value). The middle right panel shows the result of the univariable and multivariable (drug target) *cis*-MR results presented as OR and 95% confidence intervals with lipid exposure ( $n=188,577$  individuals) and CHD outcome ( $n= 60,801$  cases and 123,504 controls). ‘\*’ indicates the MR estimates as being replicated, and ‘†’ that the lipid effect and CHD signals are co-localized. The bottom panel shows disease associations at the locus with 102 clinical end points from UK Biobank and GWAS Consortia.

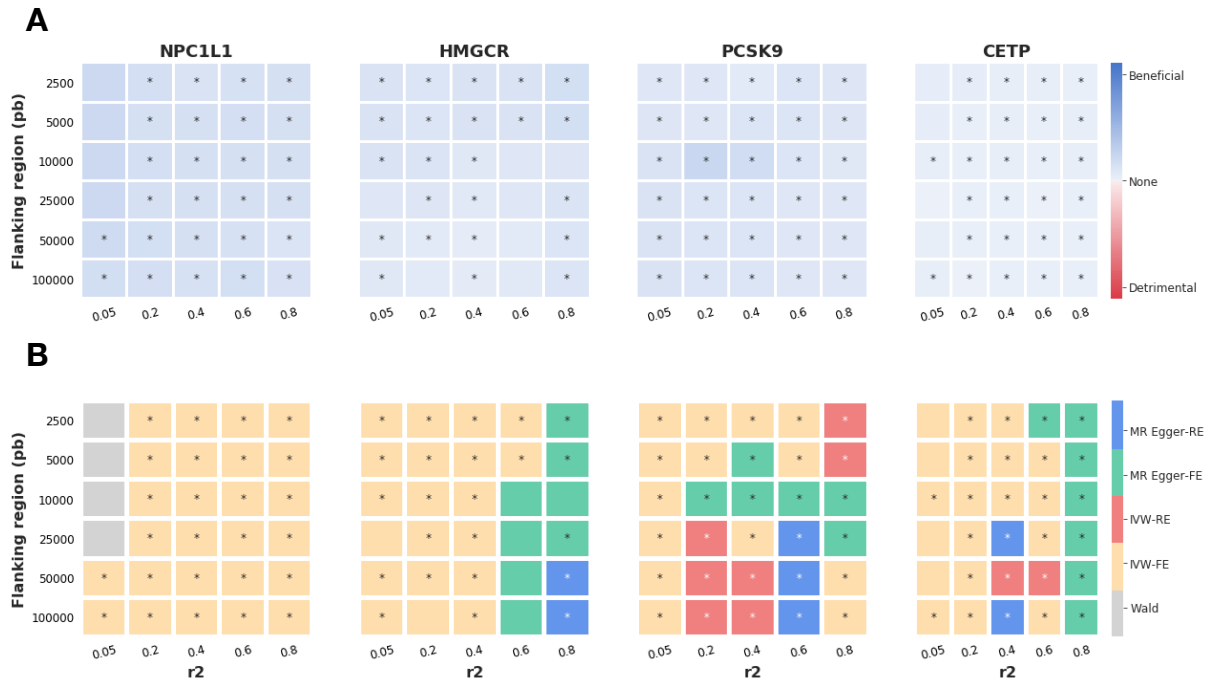

**Supplementary Figure 34. Drug target MR of positive control examples.** Grid search of LD threshold and region around the gene encoding a druggable target using genetic associations with LDL-C and HDL-C from the Global Lipid Genetic Consortium (GLGC) with CHD events from the CardiogramPlusC4D Consortium. MR estimates (**A**) and preferred model (**B**) for three licensed LDL-lowering drug targets and HDL-lowering CETP using lipid data from GLGC and CHD data from CardiogramPlusC4D in the discovery analysis. Models explored: MR Egger-RE (random effects), MR Egger-RE (fixed effects), inverse variance weighted (IVW)-RE (random effects), IVW-FE (fixed effects), Wald ratio.

**Supplementary Table 1. Main conceptual differences between *genome-wide biomarker* and *drug target* MR approaches.**

|                       | <b>Genome-wide biomarker MR</b>        | <b>Drug target MR</b>                                                 |
|-----------------------|----------------------------------------|-----------------------------------------------------------------------|
| <b>Aim</b>            | Causal effect of a biomarker           | Causal relevance of a drug target                                     |
| <b>SNP selection</b>  | Genome-wide                            | Locus specific                                                        |
| <b>Ideal exposure</b> | Clinically relevant quantitative trait | mRNA or protein expression of the encoded gene                        |
| <b>MR methods</b>     | Any described MR method                | Methods accounting for residual genetic correlation to maximize power |

**Supplementary Table 2. Causal odds ratios (95% CI) for CHD per standard deviation increase in each lipid sub-fraction from a biomarker MR analysis.**

| Method                               | LDL-C<br>(OR, 95%CI)                    | HDL-C<br>(OR, 95%CI)                    | Triglycerides<br>(OR, 95%CI)            | Ref. |
|--------------------------------------|-----------------------------------------|-----------------------------------------|-----------------------------------------|------|
| Regression-based<br>method           | 1.46 (1.37, 1.57)<br>No. variants = 185 | 0.96 (0.89, 1.03)<br>No. variants = 185 | 1.43 (1.28, 1.61)<br>No. variants = 185 | (1)  |
| Multivariable<br>IVW MR              | 1.48 (1.36, 1.61)<br>No. variants = 185 | 0.93 (0.85, 1.02)<br>No. variants = 185 | 1.16 (1.04, 1.29)<br>No. variants = 185 | (2)  |
| Univariable<br>MR-Egger regression   | 1.51 (1.30, 1.63)<br>No. variants = 418 | 0.95 (0.90, 1.01)<br>No. variants = 456 | 1.11 (1.01, 1.21)<br>No. variants = 381 | -    |
| Multivariable<br>MR-Egger regression | 1.53 (1.44, 1.62)<br>No. variants = 677 | 0.91 (0.86, 0.95)<br>n = 677            | 1.09 (1.01, 1.17)<br>No. variants = 677 | -    |

All the studies used variants from the Global Lipid Genetic Consortium (GLGC) to instrument causal effects of LDL-C, HDL-C and triglycerides on CHD from the CardiogramPlusC4D Consortium. For details see text. OR = odds ratio per 1-SD increase in LDL-C/HDL-C or triglycerides; CI = confidence interval.

**Supplementary Table 3. Publicly available GWAS data used in the phenome-wide association analysis (PheWAS).**

| Trait                           | No. Events | Sample size | URL                                                                                                                                                                                                   |
|---------------------------------|------------|-------------|-------------------------------------------------------------------------------------------------------------------------------------------------------------------------------------------------------|
| <b>Rheumatoid arthritis</b>     | 14361      | 57284       | <a href="https://grasp.nhlbi.nih.gov/downloads/ResultsOctober2016/Okada/">https://grasp.nhlbi.nih.gov/downloads/ResultsOctober2016/Okada/</a>                                                         |
| <b>Juvenile arthritis</b>       | 2816       | 15872       | <a href="http://ftp.ebi.ac.uk/pub/databases/gwas/summary_statistics/HinksA_23603761_GCST005528/">http://ftp.ebi.ac.uk/pub/databases/gwas/summary_statistics/HinksA_23603761_GCST005528/</a>           |
| <b>Ankylosing spondylitis</b>   | 10619      | 15145       | <a href="https://ftp.ebi.ac.uk/pub/databases/gwas/summary_statistics/CortesA_23749187_GCST005529/">https://ftp.ebi.ac.uk/pub/databases/gwas/summary_statistics/CortesA_23749187_GCST005529/</a>       |
| <b>Ulcerative colitis</b>       | 6968       | 27432       | <a href="http://ftp.ebi.ac.uk/pub/databases/gwas/summary_statistics/LiuJZ_26192919_GCST003045/">http://ftp.ebi.ac.uk/pub/databases/gwas/summary_statistics/LiuJZ_26192919_GCST003045/</a>             |
| <b>Psoriasis</b>                | 10588      | 33394       | <a href="http://ftp.ebi.ac.uk/pub/databases/gwas/summary_statistics/TSoilC_23143594_GCST005527/">http://ftp.ebi.ac.uk/pub/databases/gwas/summary_statistics/TSoilC_23143594_GCST005527/</a>           |
| <b>Crohn disease</b>            | 22575      | 69268       | <a href="http://ftp.ebi.ac.uk/pub/databases/gwas/summary_statistics/LiuJZ_26192919">http://ftp.ebi.ac.uk/pub/databases/gwas/summary_statistics/LiuJZ_26192919</a>                                     |
| <b>Stroke</b>                   | 34217      | 440328      | <a href="http://www.megastroke.org/index.html">http://www.megastroke.org/index.html</a>                                                                                                               |
| <b>Asthma</b>                   | 5135       | 30810       | <a href="https://www.thelancet.com/journals/lanres/article/PIIS2213-2600(18)30389-8/fulltext">https://www.thelancet.com/journals/lanres/article/PIIS2213-2600(18)30389-8/fulltext</a>                 |
| <b>Multiple sclerosis</b>       | 14498      | 38589       | <a href="https://www.ncbi.nlm.nih.gov/pmc/articles/PMC3832895/">https://www.ncbi.nlm.nih.gov/pmc/articles/PMC3832895/</a>                                                                             |
| <b>Gout</b>                     | 13179      | 882413      | <a href="http://ftp.ebi.ac.uk/pub/databases/gwas/summary_statistics/TinA_31578528_GCST008970/">http://ftp.ebi.ac.uk/pub/databases/gwas/summary_statistics/TinA_31578528_GCST008970/</a>               |
| <b>Ovarian neoplasms</b>        | 16924      | 85426       | <a href="http://ftp.ebi.ac.uk/pub/databases/gwas/summary_statistics/PhelanCM_28346442_GCST004462/">http://ftp.ebi.ac.uk/pub/databases/gwas/summary_statistics/PhelanCM_28346442_GCST004462/</a>       |
| <b>Parkinson disease</b>        | 15056      | 27693       | <a href="https://drive.google.com/drive/folders/10bGj6HfAXgl-Jslpl9ZJIL_JlgZyktxn">https://drive.google.com/drive/folders/10bGj6HfAXgl-Jslpl9ZJIL_JlgZyktxn</a>                                       |
| <b>Alzheimer disease</b>        | 71880      | 455258      | <a href="https://www.ncbi.nlm.nih.gov/pubmed/30617256">https://www.ncbi.nlm.nih.gov/pubmed/30617256</a>                                                                                               |
| <b>Type 2 diabetes mellitus</b> | 74124      | 898130      | <a href="https://www.nature.com/articles/s41588-018-0241-6">https://www.nature.com/articles/s41588-018-0241-6</a>                                                                                     |
| <b>Myocardial infarction</b>    | 40149      | 126310      | <a href="http://www.cardiogramplusc4d.org/data-downloads/">http://www.cardiogramplusc4d.org/data-downloads/</a>                                                                                       |
| <b>Heart failure</b>            | 47309      | 977323      | <a href="https://www.nature.com/articles/s41467-019-13690-5">https://www.nature.com/articles/s41467-019-13690-5</a>                                                                                   |
| <b>Atrial fibrillation</b>      | 60620      | 1030836     | <a href="https://www.nature.com/articles/s41588-018-0171-3">https://www.nature.com/articles/s41588-018-0171-3</a>                                                                                     |
| <b>Diabetic nephropathies</b>   | 5908       | 10875       | <a href="http://ftp.ebi.ac.uk/pub/databases/gwas/summary_statistics/vanZuydamNR_29703844_GCST005881">http://ftp.ebi.ac.uk/pub/databases/gwas/summary_statistics/vanZuydamNR_29703844_GCST005881</a>   |
| <b>Chronic kidney failure</b>   | 64164      | 625219      | <a href="https://www.ncbi.nlm.nih.gov/pmc/articles/PMC6698888/">https://www.ncbi.nlm.nih.gov/pmc/articles/PMC6698888/</a>                                                                             |
| <b>Schizophrenia</b>            | 35476      | 46839       | <a href="http://www.med.unc.edu/pgc/files/resultfiles/">http://www.med.unc.edu/pgc/files/resultfiles/</a>                                                                                             |
| <b>Narcolepsy</b>               | 1886       | 12307       | <a href="http://ftp.ebi.ac.uk/pub/databases/gwas/summary_statistics/FaracoJ_23459209_GCST005522/">http://ftp.ebi.ac.uk/pub/databases/gwas/summary_statistics/FaracoJ_23459209_GCST005522/</a>         |
| <b>Atopic dermatitis</b>        | 21399      | 95464       | <a href="http://ftp.ebi.ac.uk/pub/databases/gwas/summary_statistics/PaternosterL_26482879_GCST003184">http://ftp.ebi.ac.uk/pub/databases/gwas/summary_statistics/PaternosterL_26482879_GCST003184</a> |
| <b>Biliary liver cirrhosis</b>  | 2764       | 13239       | <a href="http://ftp.ebi.ac.uk/pub/databases/gwas/summary_statistics/CordellHJ_26394269_GCST003129">http://ftp.ebi.ac.uk/pub/databases/gwas/summary_statistics/CordellHJ_26394269_GCST003129</a>       |
